# Supplementary material for: Paralemnolins X and Y, New Antimicrobial Sesquiterpenoids from the Soft Coral Paralemnalia thyrsoide
Source: MDPI journal article supplement (doi:10.3390/antibiotics10101158), 2021-09-24
Supplement: s1 [file s1]

## Supplementary material

### Paralemnolins X and Y, New Antimicrobial Sesquiterpenoids from the Soft Coral *Paralemnalia thyrsoide*

Abdelsamed I. Elshamy<sup>1</sup>, Tarik A. Mohamed<sup>2</sup>, Eman M. Elkady<sup>3</sup>, Ibrahim A. Saleh<sup>2</sup>, Ahmed A. El-Beih<sup>4</sup>, Montaser A. Alhammady<sup>5</sup>, Shinji Ohta<sup>6</sup>, Akemi Umeyama<sup>7</sup>, Paul W. Pare<sup>8</sup>, Mohamed-Elamir F. Hegazy<sup>2,9</sup>

<sup>1</sup>Department of Natural Compounds Chemistry, National Research Centre, 33 El-Bohouth St., Dokki, Giza 12622, Egypt; ai.el-shamy@nrc.sci.eg (A.I.E.).

<sup>2</sup>Chemistry of Medicinal Plants Dept., National Research Centre, 33 El-Bohouth St., Dokki, Giza 12622, Egypt; ta.mourad@nrc.sci.eg (T.A.M.); ia.saleh@nrc.sci.eg (I.A.S.).

<sup>3</sup>National Institute of Oceanography & Fisheries, NIOF, Cairo 11516, Egypt; emelkady@yahoo.com (E.M.E.); coralreef\_niof1@yahoo.com (M.A.A.).

<sup>4</sup>Chemistry of Natural & Microbial Products Dept., National Research Centre, Dokki, Giza 12622, Egypt; aa.el-beih@nrc.sci.eg (A.A.E.).

<sup>5</sup>National Institute of Oceanography and Fisheries, Red Sea Branch, Hurghada 84511, Egypt; E-Mail: cor-alreef\_niof1@yahoo.com (M.A.A.).

<sup>6</sup>Graduate School of Integrated Sciences for Life, Hiroshima University, 1-7-1 Kagamiyama, Higashi- Hiroshima 739-8521, Japan; ohta@hiroshima-u.ac.jp (S.O.).

<sup>7</sup>Faculty of Pharmaceutical Sciences, Tokushima Bunri University, Yamashiro-cho, Tokushima, 770-8514, Japan; umeyama@ph.bunri-u.ac.jp (A.U.)

<sup>8</sup>Department of Chemistry & Biochemistry Texas Tech University, Lubbock, TX 79409 USA; paul.pare@ttu.edu (P.W.P.).

<sup>9</sup>Department of Pharmaceutical Biology, Institute of Pharmaceutical and Biomedical Sciences, Johannes Gutenberg University, Staudinger Weg 5, 55128 Mainz, Germany.

\* Correspondence: paul.pare@ttu.edu (P.W.P.); mohegazy@uni-mainz.de (M.E.F.H.); Tel.: +1-806-834-0461(P.W.P); Tel.: +2 033 371 635 (M.E.F.H.)

| Supporting data                                           | Page |
|-----------------------------------------------------------|------|
| S1: LRCIMS of <b>1</b> .....                              | 4    |
| S2: HRCIMS of <b>1</b> .....                              | 4    |
| S3: <sup>1</sup> H NMR of <b>1</b> .....                  | 5    |
| S4: <sup>13</sup> C NMR of <b>1</b> .....                 | 6    |
| S5: DEPT 135 of <b>1</b> .....                            | 7    |
| S6: HSQC of <b>1</b> .....                                | 8    |
| S7: HMBC of <b>1</b> .....                                | 9    |
| S8: <sup>1</sup> H <sup>1</sup> H COSY of <b>1</b> .....  | 10   |
| S9: NOESY of <b>1</b> .....                               | 11   |
| S10: LRCIMS of <b>2</b> .....                             | 12   |
| S11: HRCIMS of <b>2</b> .....                             | 13   |
| S12: <sup>1</sup> H NMR of <b>2</b> .....                 | 13   |
| S13: <sup>13</sup> C NMR of <b>2</b> .....                | 14   |
| S14: DEPT 135 of <b>2</b> .....                           | 15   |
| S15: HSQC of <b>2</b> .....                               | 16   |
| S16: HMBC of <b>2</b> .....                               | 17   |
| S17: <sup>1</sup> H <sup>1</sup> H COSY of <b>2</b> ..... | 18   |
| S18: NOESY of <b>2</b> .....                              | 19   |
| S19: LRCIMS of <b>3</b> .....                             | 20   |
| S20: <sup>1</sup> H NMR of <b>3</b> .....                 | 21   |
| S21: <sup>13</sup> C NMR of <b>3</b> .....                | 22   |
| S22: LRCIMS of <b>4</b> .....                             | 23   |
| S23: <sup>1</sup> H NMR of <b>4</b> .....                 | 24   |
| S24: <sup>13</sup> C NMR of <b>4</b> .....                | 25   |
| S25: LRCIMS of <b>5</b> .....                             | 26   |
| S26: <sup>1</sup> H NMR of <b>5</b> .....                 | 27   |
| S27: <sup>13</sup> C NMR of <b>5</b> .....                | 28   |
| S28: LRCIMS of <b>6</b> .....                             | 29   |
| S29: <sup>1</sup> H NMR of <b>6</b> .....                 | 30   |
| S30: <sup>13</sup> C NMR of <b>6</b> .....                | 31   |
| S31: LRCIMS of <b>7</b> .....                             | 32   |
| S32: <sup>1</sup> H NMR of <b>7</b> .....                 | 33   |

|                                             |    |
|---------------------------------------------|----|
| S33: $^{13}\text{C}$ NMR of <b>7</b> .....  | 34 |
| S34: LRCIMS of <b>8</b> .....               | 35 |
| S35: $^1\text{H}$ NMR of <b>8</b> .....     | 36 |
| S36: $^{13}\text{C}$ NMR of <b>8</b> .....  | 37 |
| S37: LRCIMS of <b>9</b> .....               | 38 |
| S38: $^1\text{H}$ NMR of <b>9</b> .....     | 39 |
| S39: $^{13}\text{C}$ NMR of <b>9</b> .....  | 40 |
| S40: LRCIMS of <b>10</b> .....              | 41 |
| S41: $^1\text{H}$ NMR of <b>10</b> .....    | 42 |
| S42: $^{13}\text{C}$ NMR of <b>10</b> ..... | 43 |
| S43: LRCIMS of <b>11</b> .....              | 44 |
| S44: $^1\text{H}$ NMR of <b>11</b> .....    | 45 |
| S45: $^{13}\text{C}$ NMR of <b>11</b> ..... | 46 |
| S46: LRCIMS of <b>12</b> .....              | 47 |
| S47: $^1\text{H}$ NMR of <b>12</b> .....    | 48 |
| S48: $^{13}\text{C}$ NMR of <b>12</b> ..... | 49 |

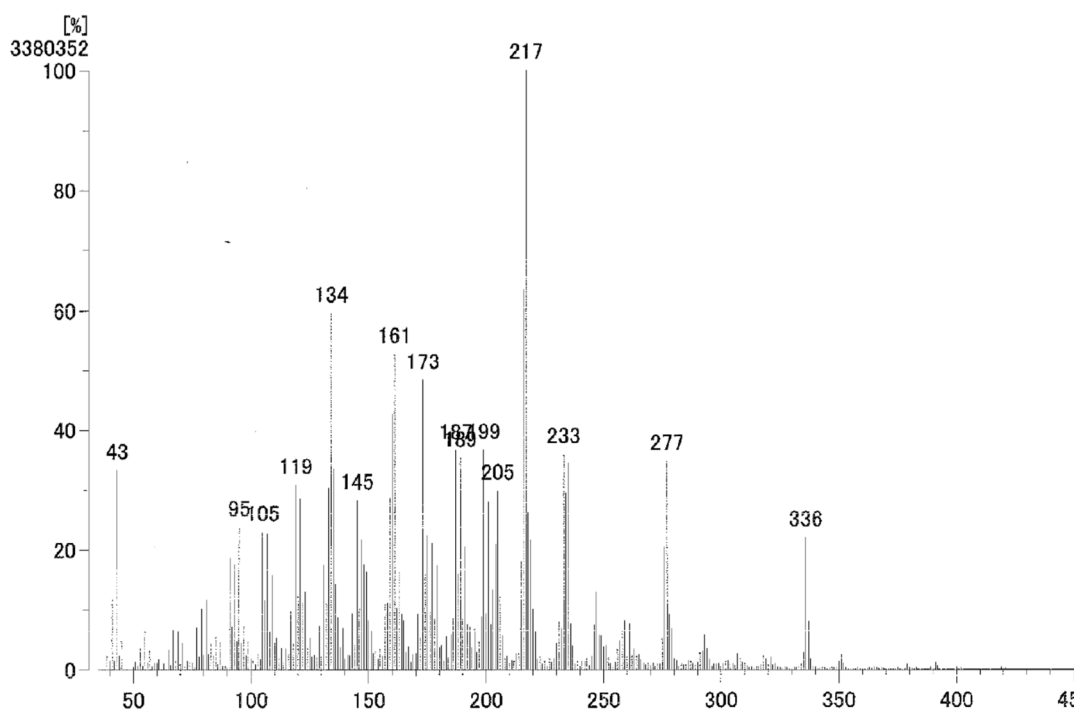

S1: LRCIMS of 1

Data : Umeyama-CIHR.06-Aug-2019.001      Date : 06-Aug-2019 15:54  
 Instrument : MStation  
 Sample : PT-312  
 Note : MStation  
 Inlet : Direct      Ion Mode : CI+  
 RT : 0.56 min      Scan# : 15  
 Elements : C 150/0, H 250/0, O 50/0  
 Mass Tolerance : 5mmu  
 Unsaturation (U.S.) : 0.0 - 15.0

|   | Observed m/z | Int%   | Err [ppm / mmu] | U.S. | Composition |
|---|--------------|--------|-----------------|------|-------------|
| 1 | 336.1940     | 100.00 | +1.0 / +0.3     | 6.0  | C19 H28 O5  |

S2: HRCIMS of 1



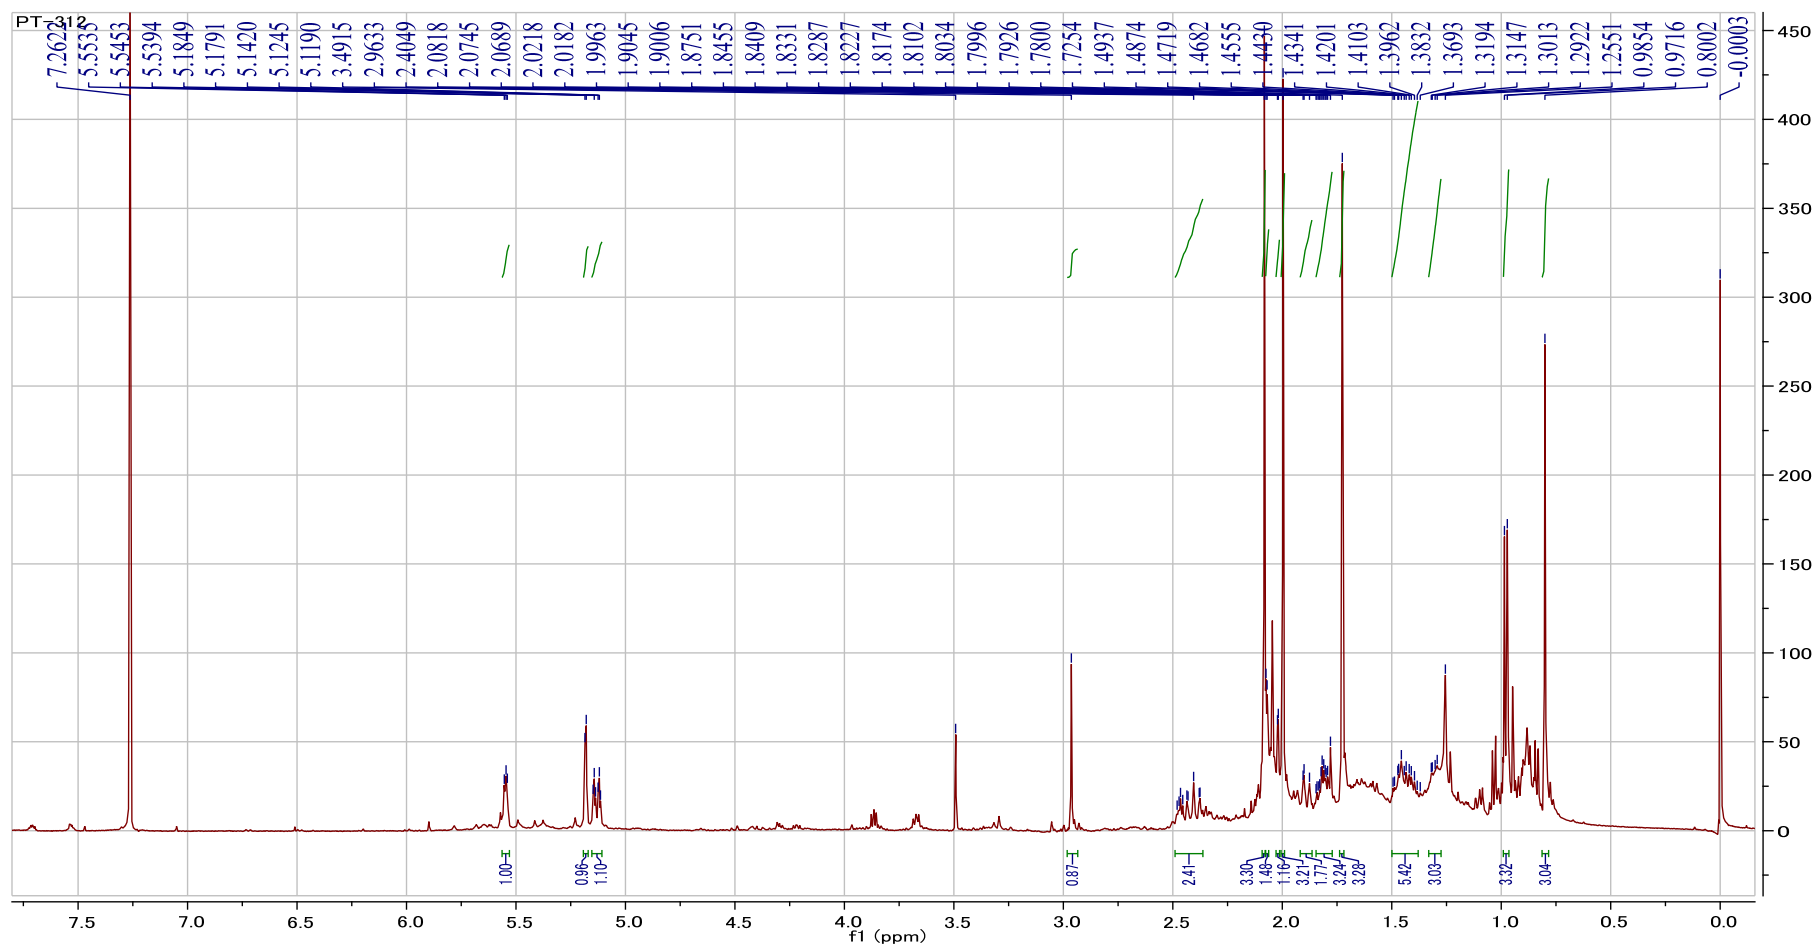

S3:  $^1\text{H}$  NMR of **1**

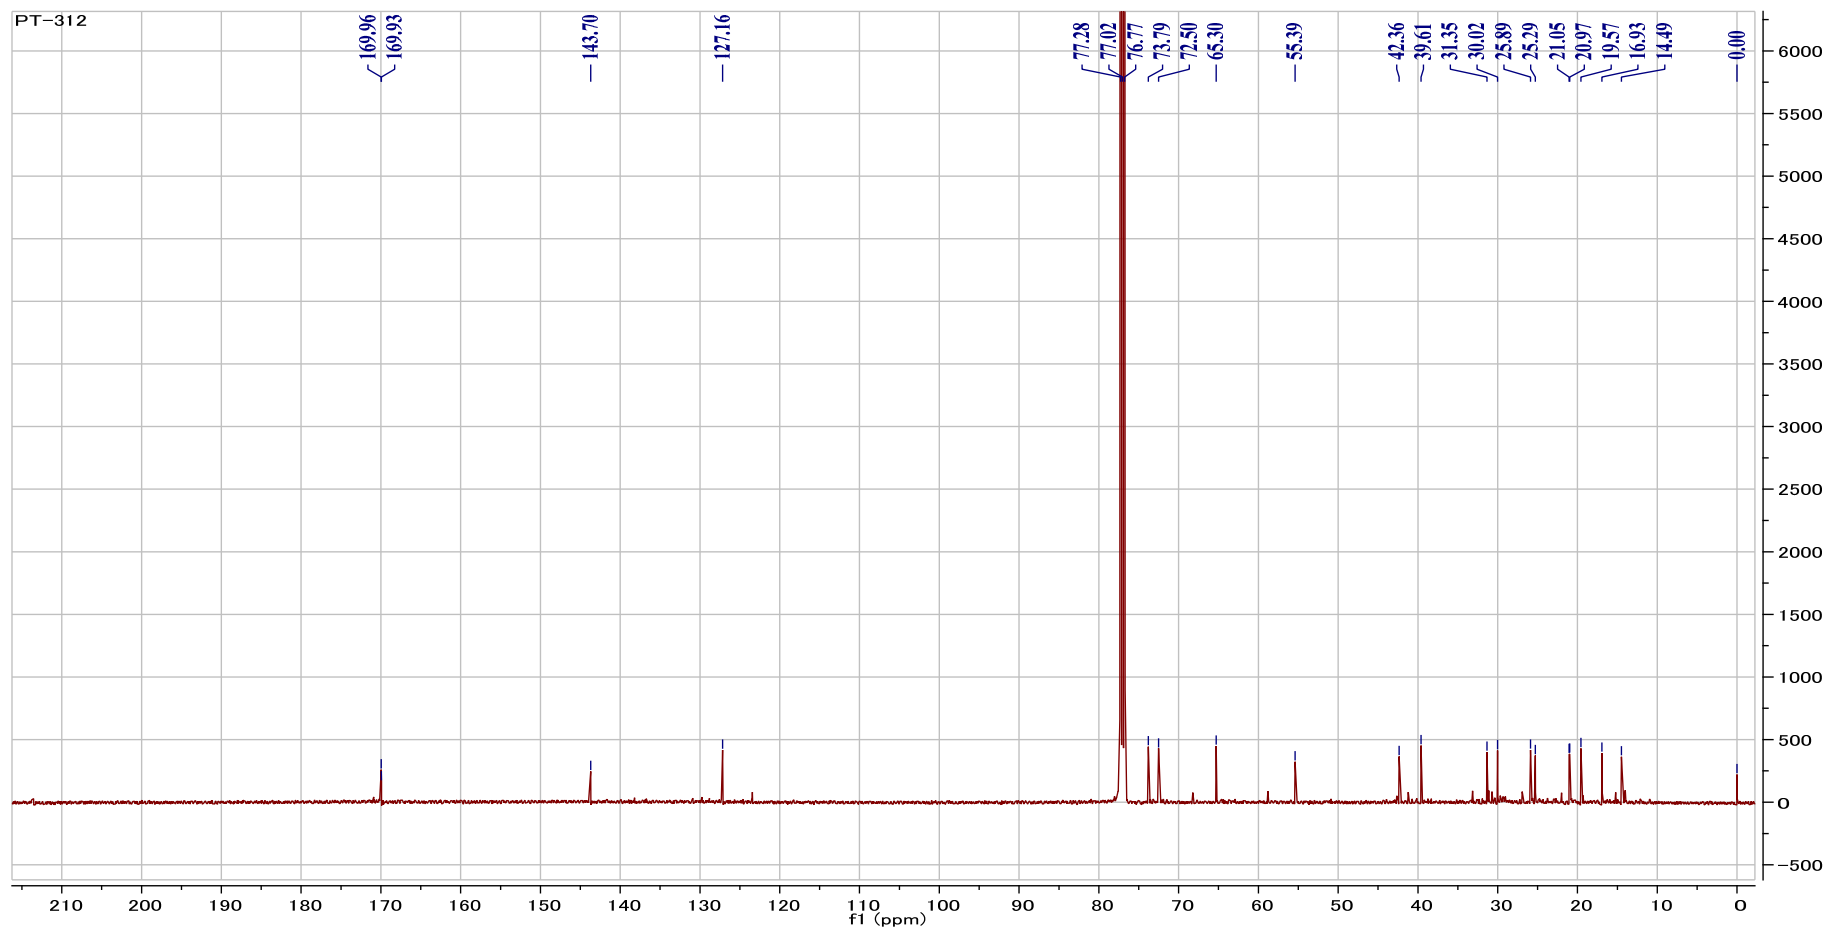

S4:  $^{13}\text{C}$  NMR of **1**

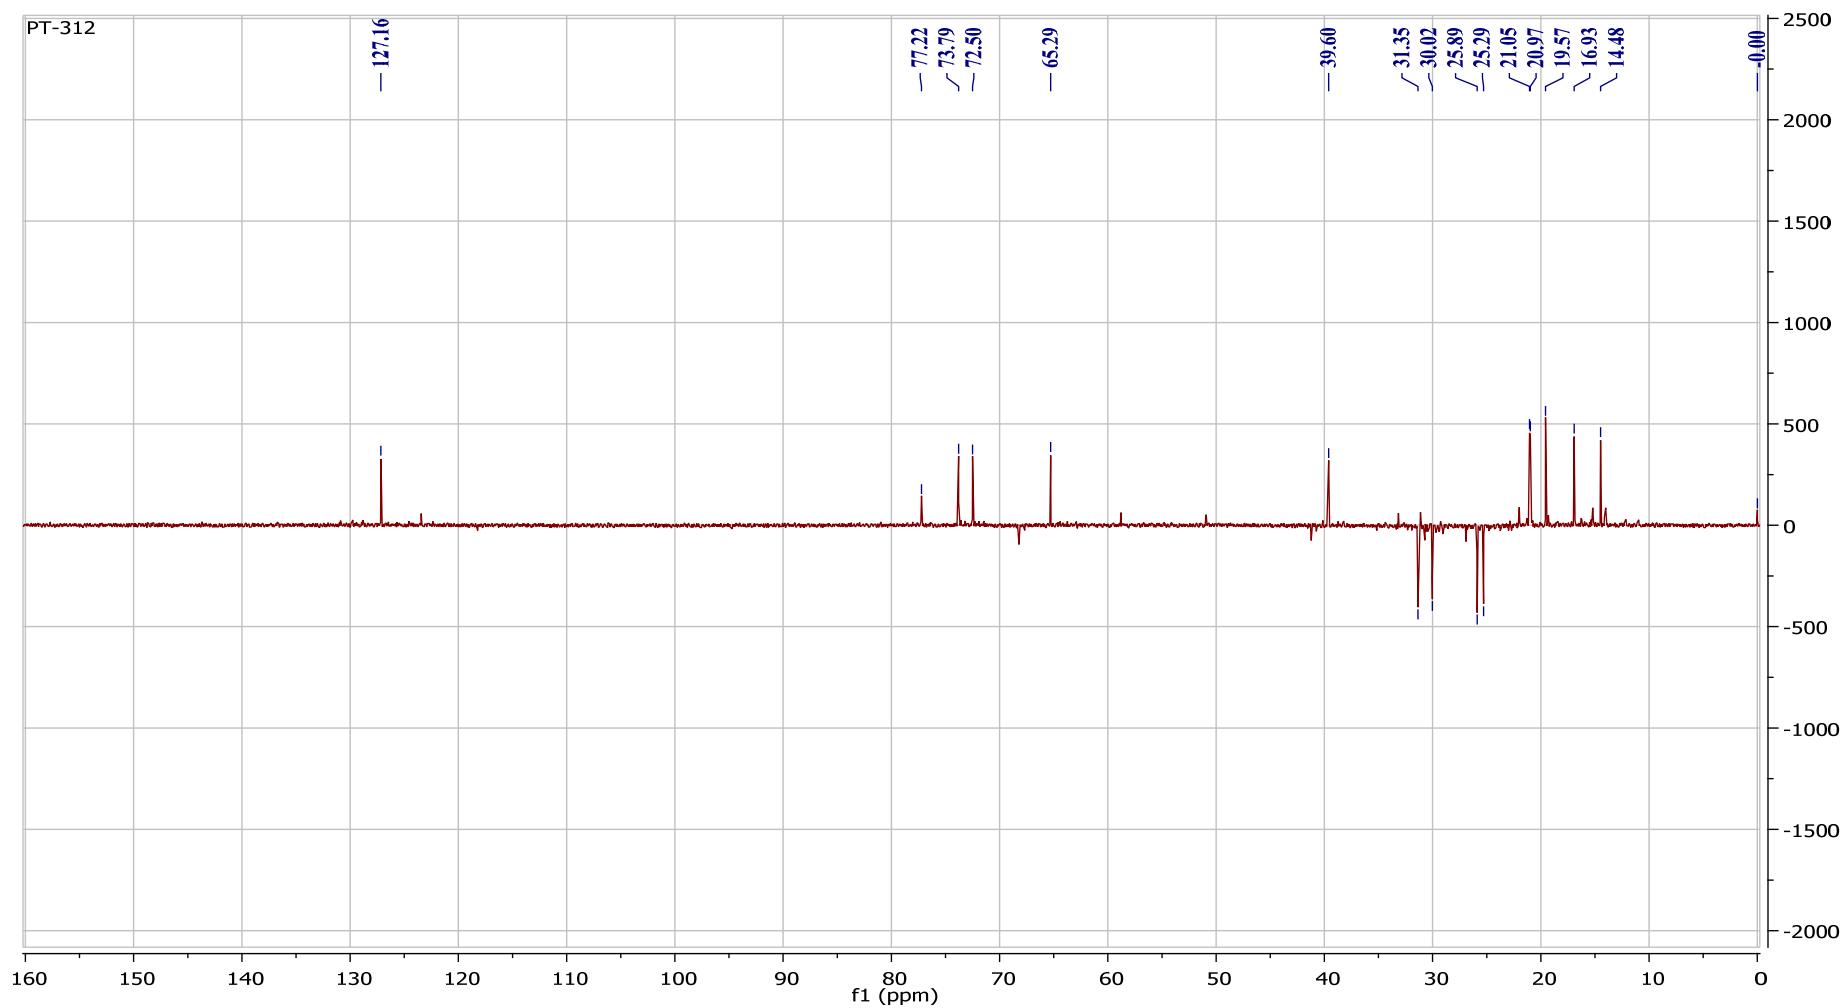

S5: DEPT-135 of 1

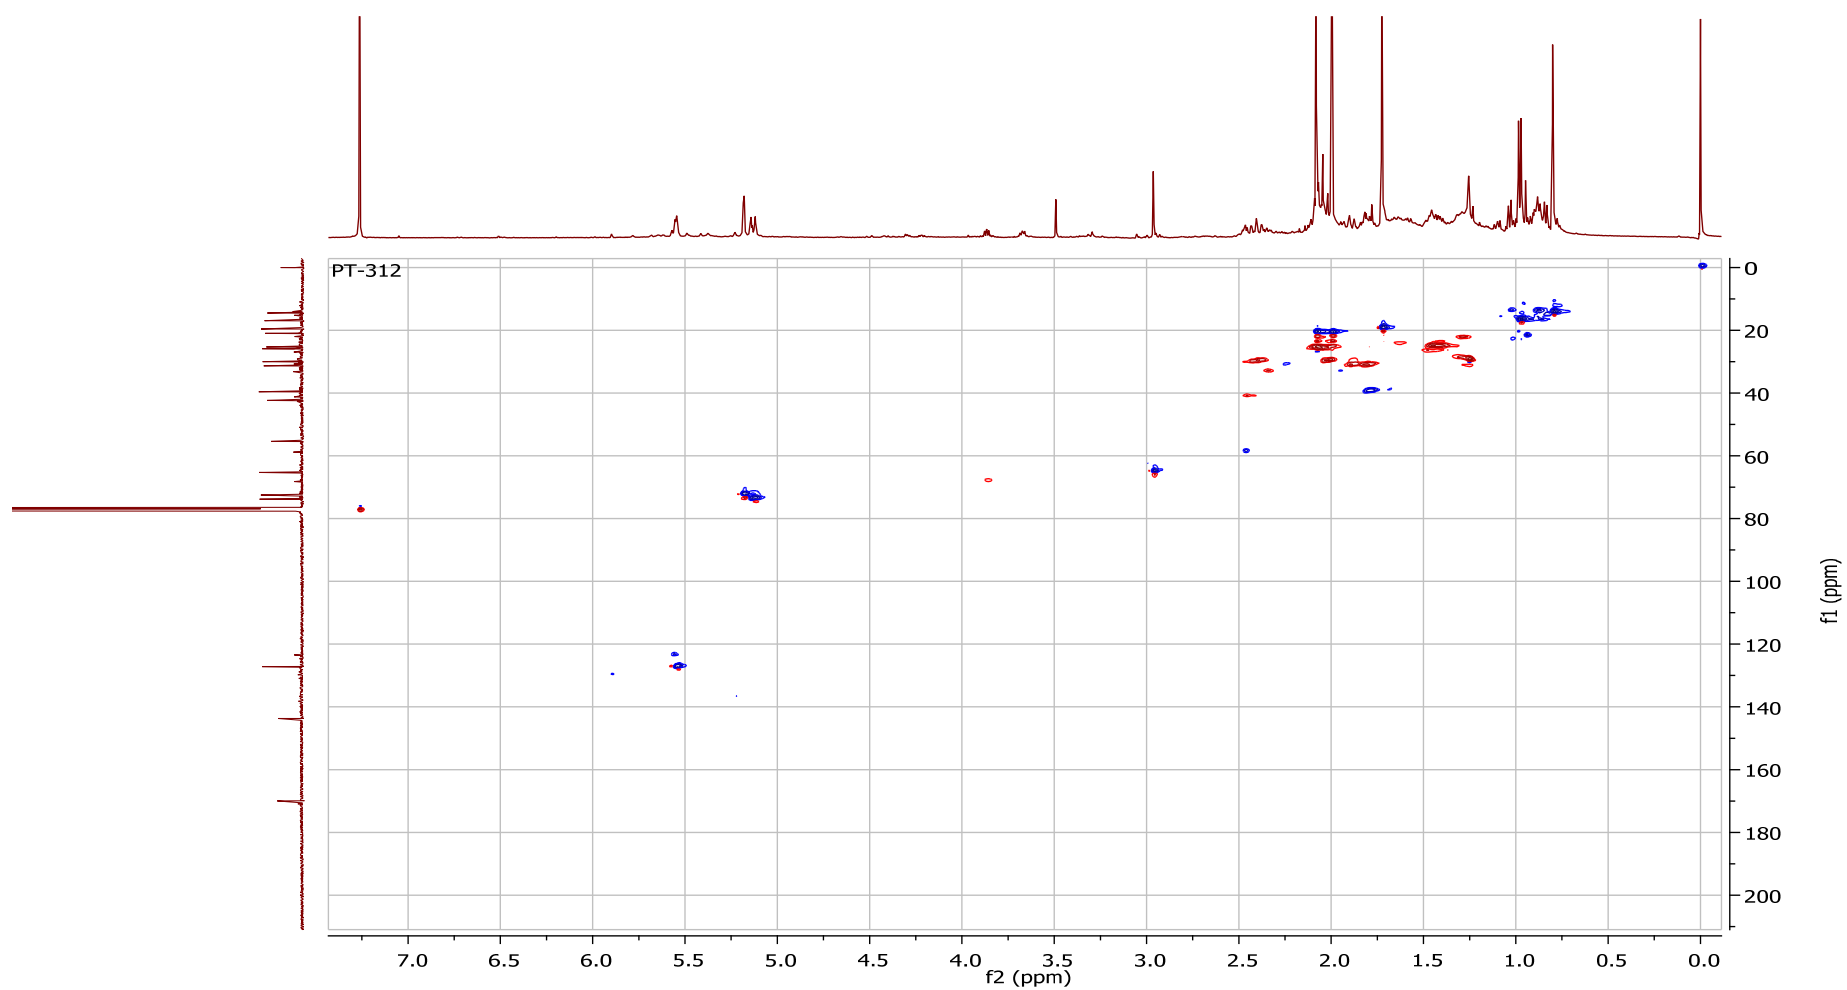

S6: HSQC of **1**

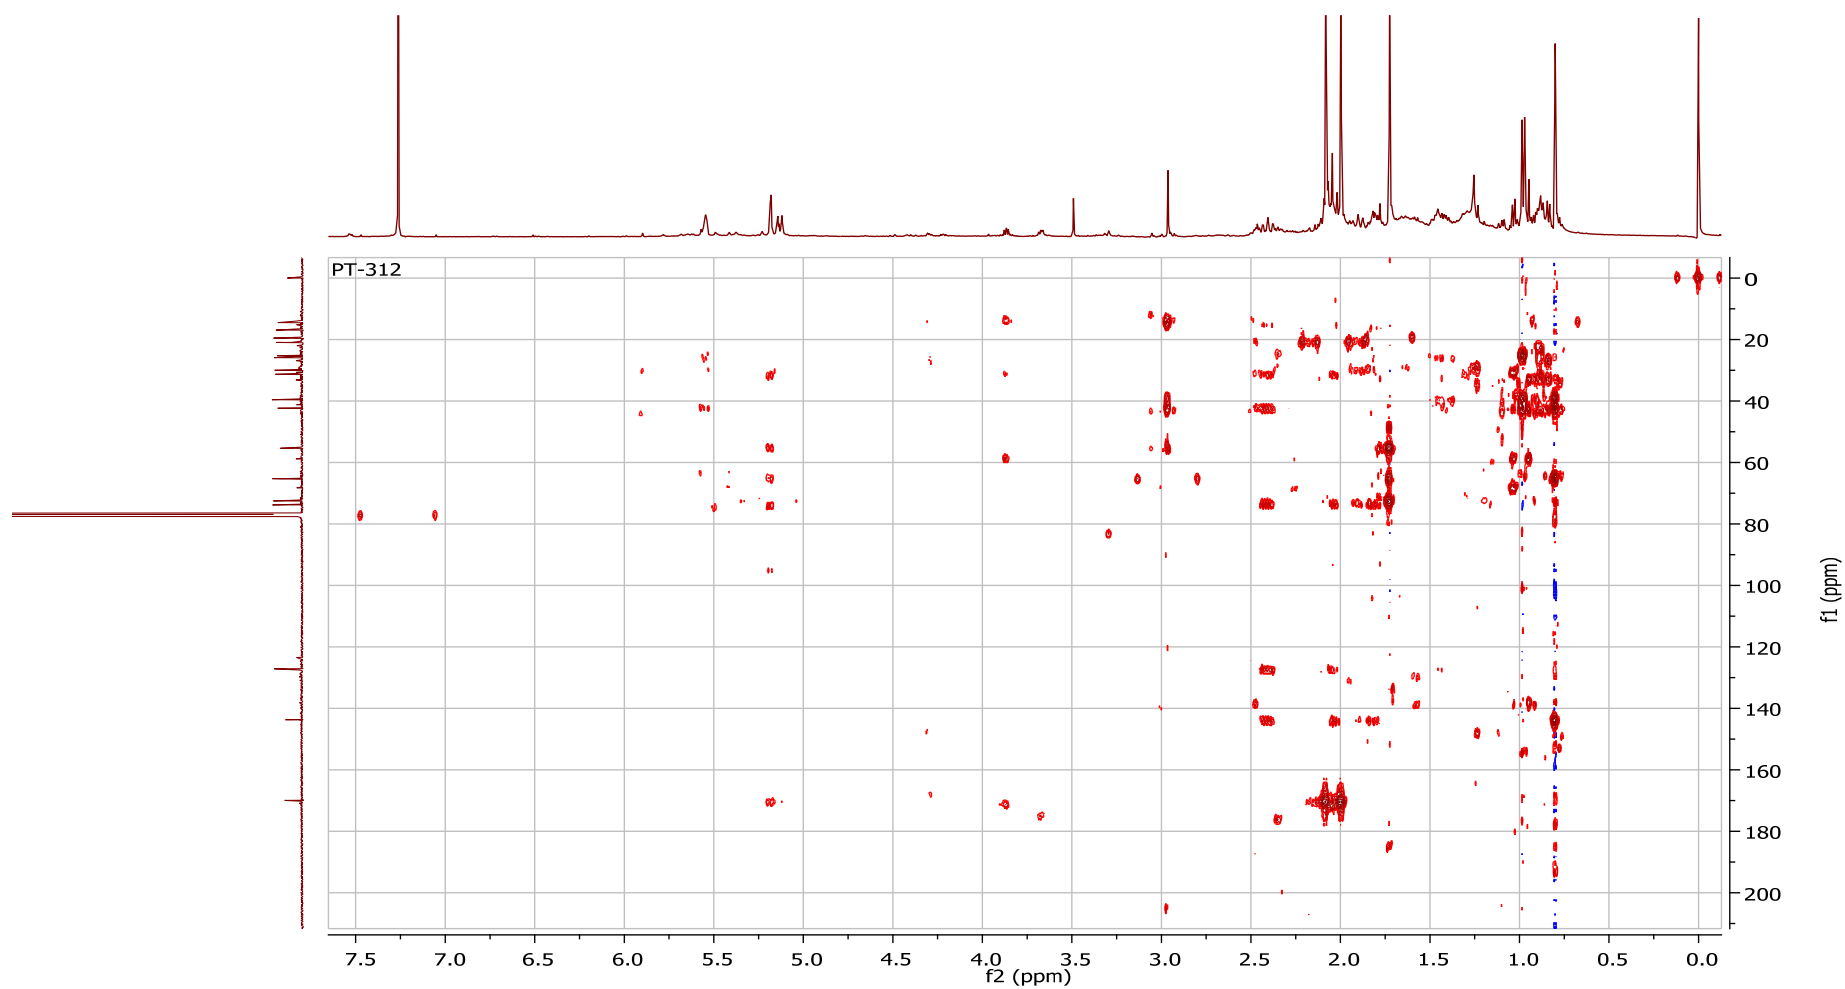

S7: HMBC of **1**

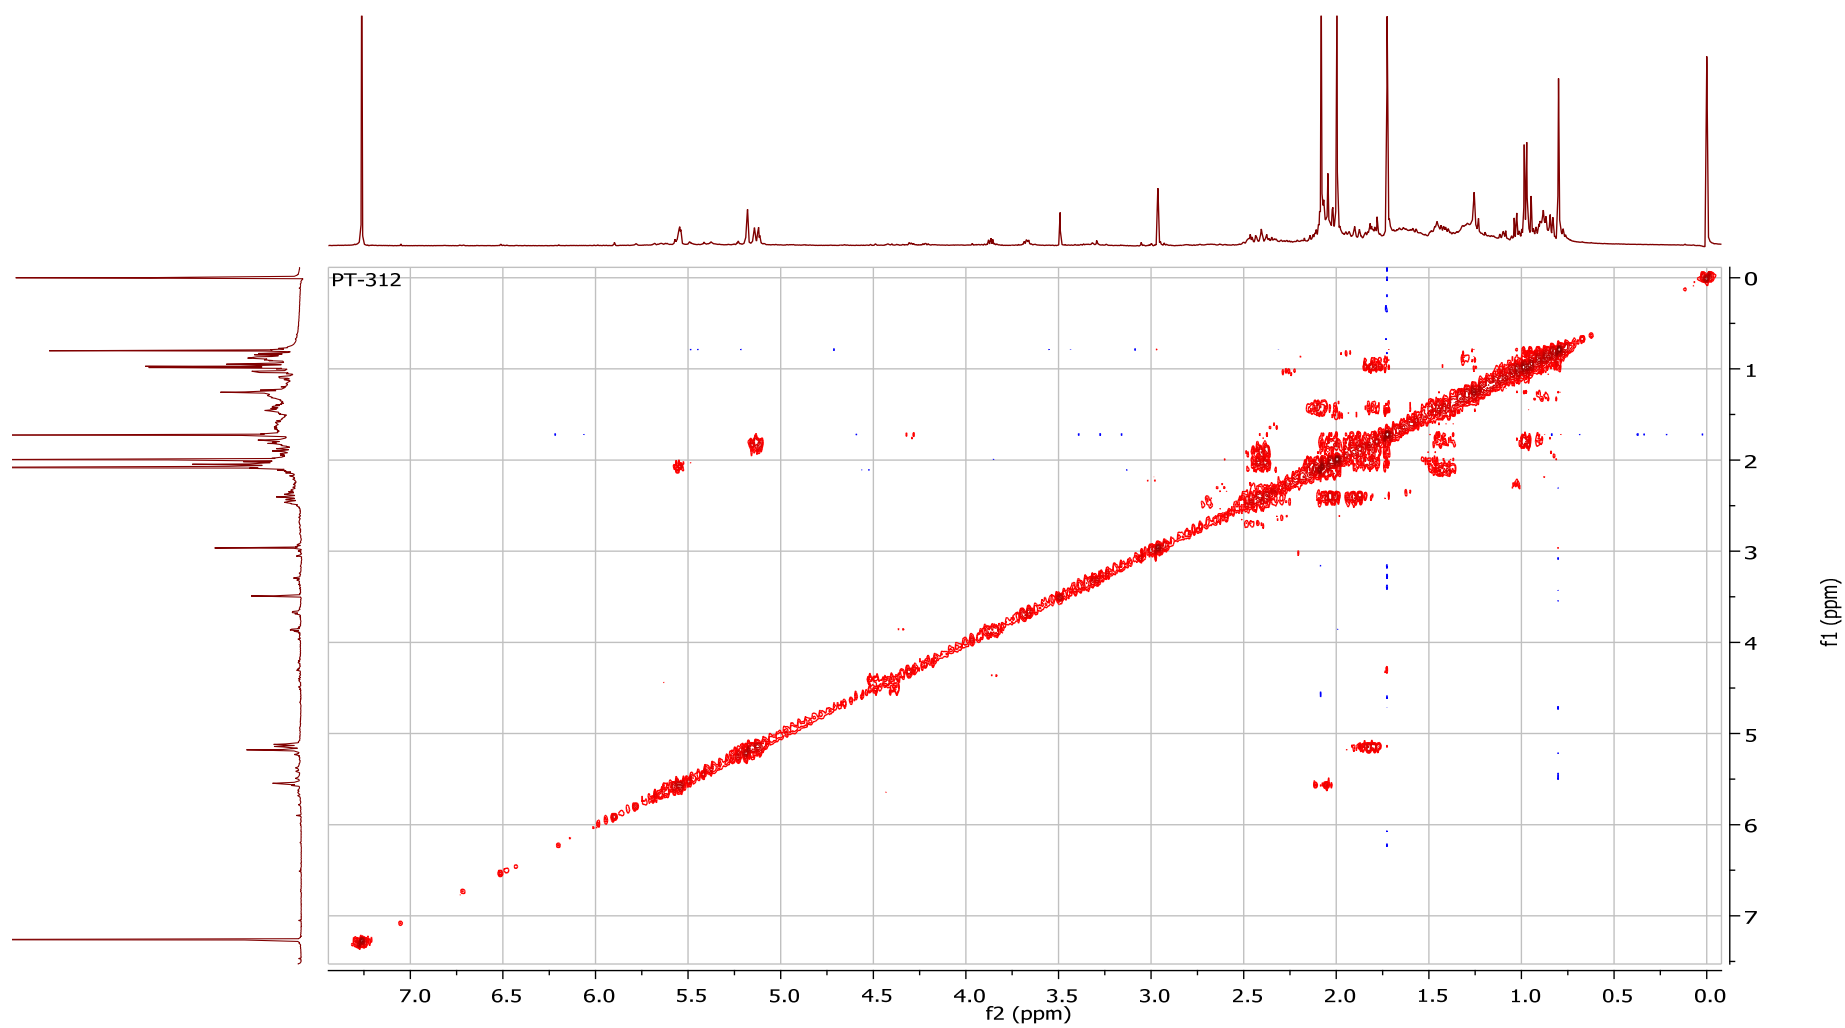

S8:  $^1\text{H}$   $^1\text{H}$  COSY of **1**

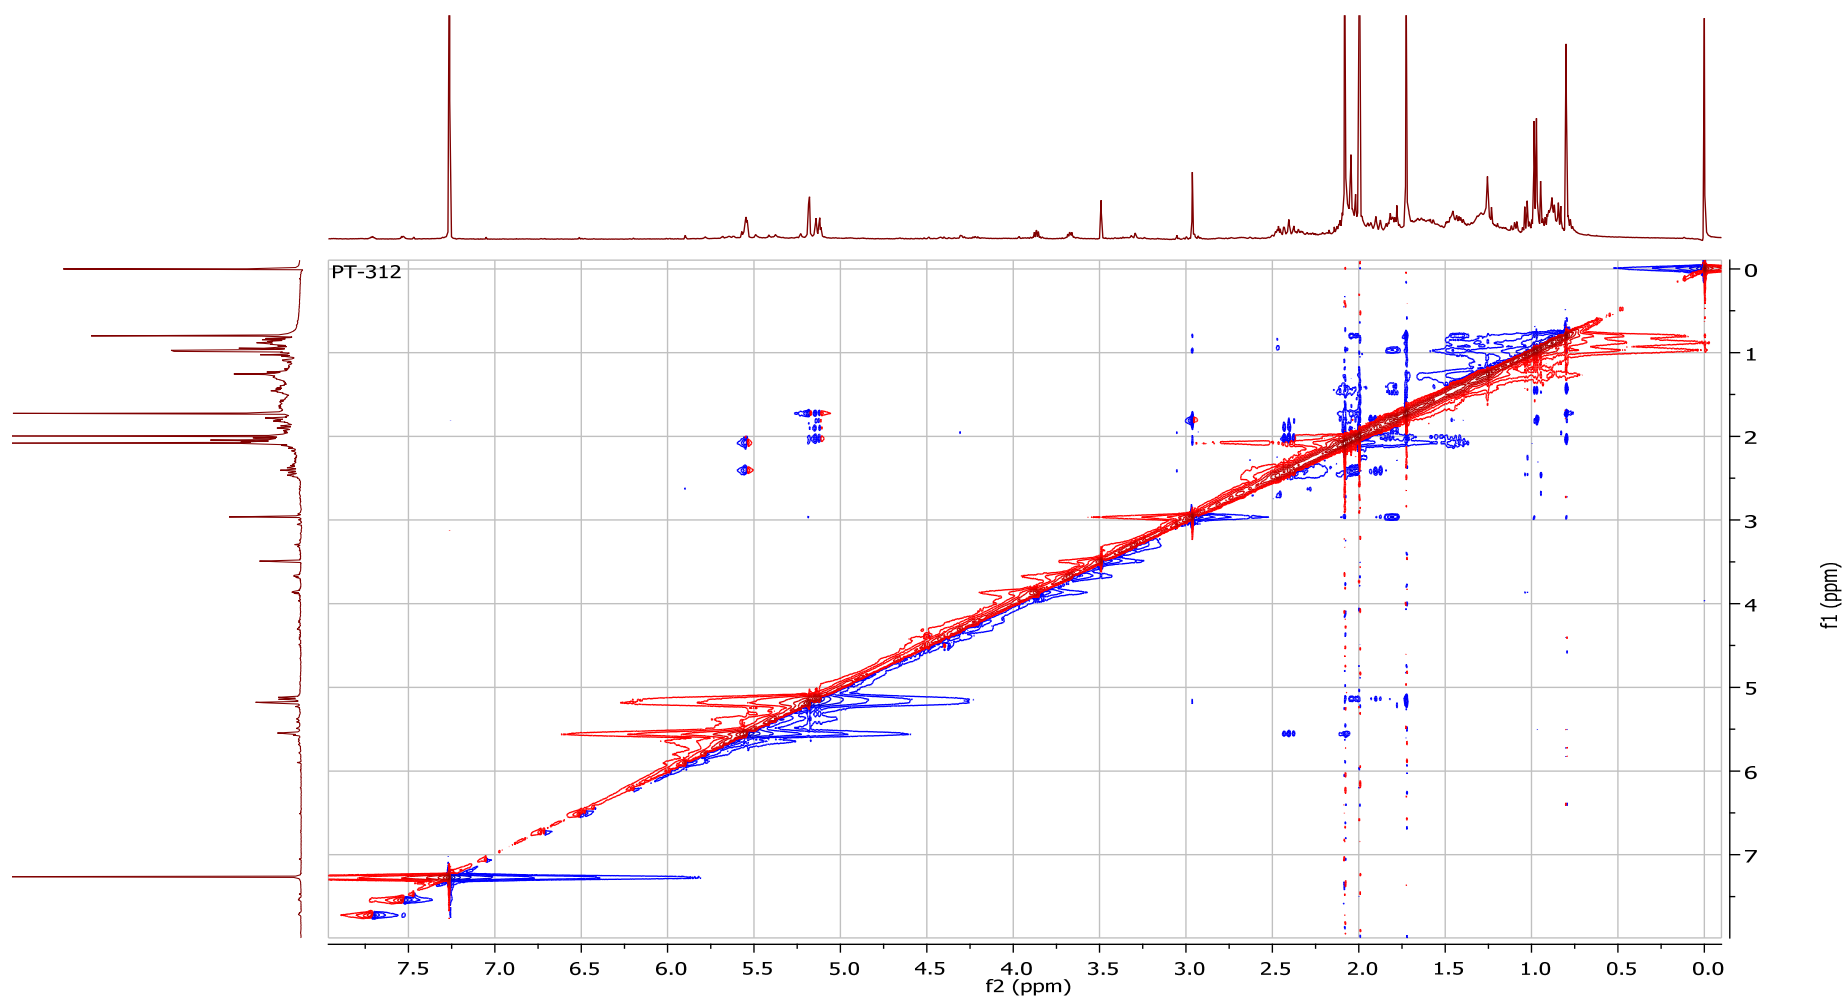

S9: NOESY of **1**

# LRCIMS

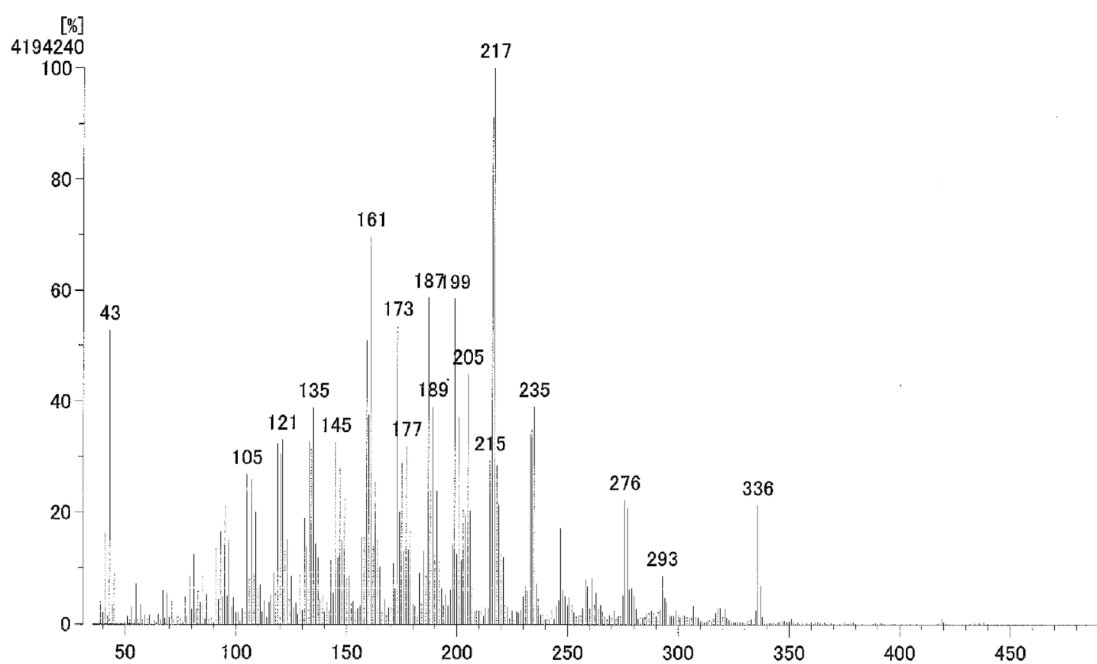

## S10: LRCIMS of 2

Data : Umeyama-CIHR.10-Aug-2019.001      Date : 10-Aug-2019 09:51  
 Instrument : MStation  
 Sample : PT-313  
 Note : MStation  
 Inlet : Direct      Ion Mode : CI+  
 RT : 0.40 min      Scan# : 11  
 Elements : C 150/0, H 250/0, O 50/0  
 Mass Tolerance : 5mmu  
 Unsaturation (U.S.) : 0.0 - 15.0

|   | Observed m/z | Int%  | Err[ppm / mmu] | U.S. Composition |
|---|--------------|-------|----------------|------------------|
| 1 | 336.1934     | 21.76 | -0.8 / -0.3    | 6.0 C19 H28 O5   |

## S11: HRCIMS of 2



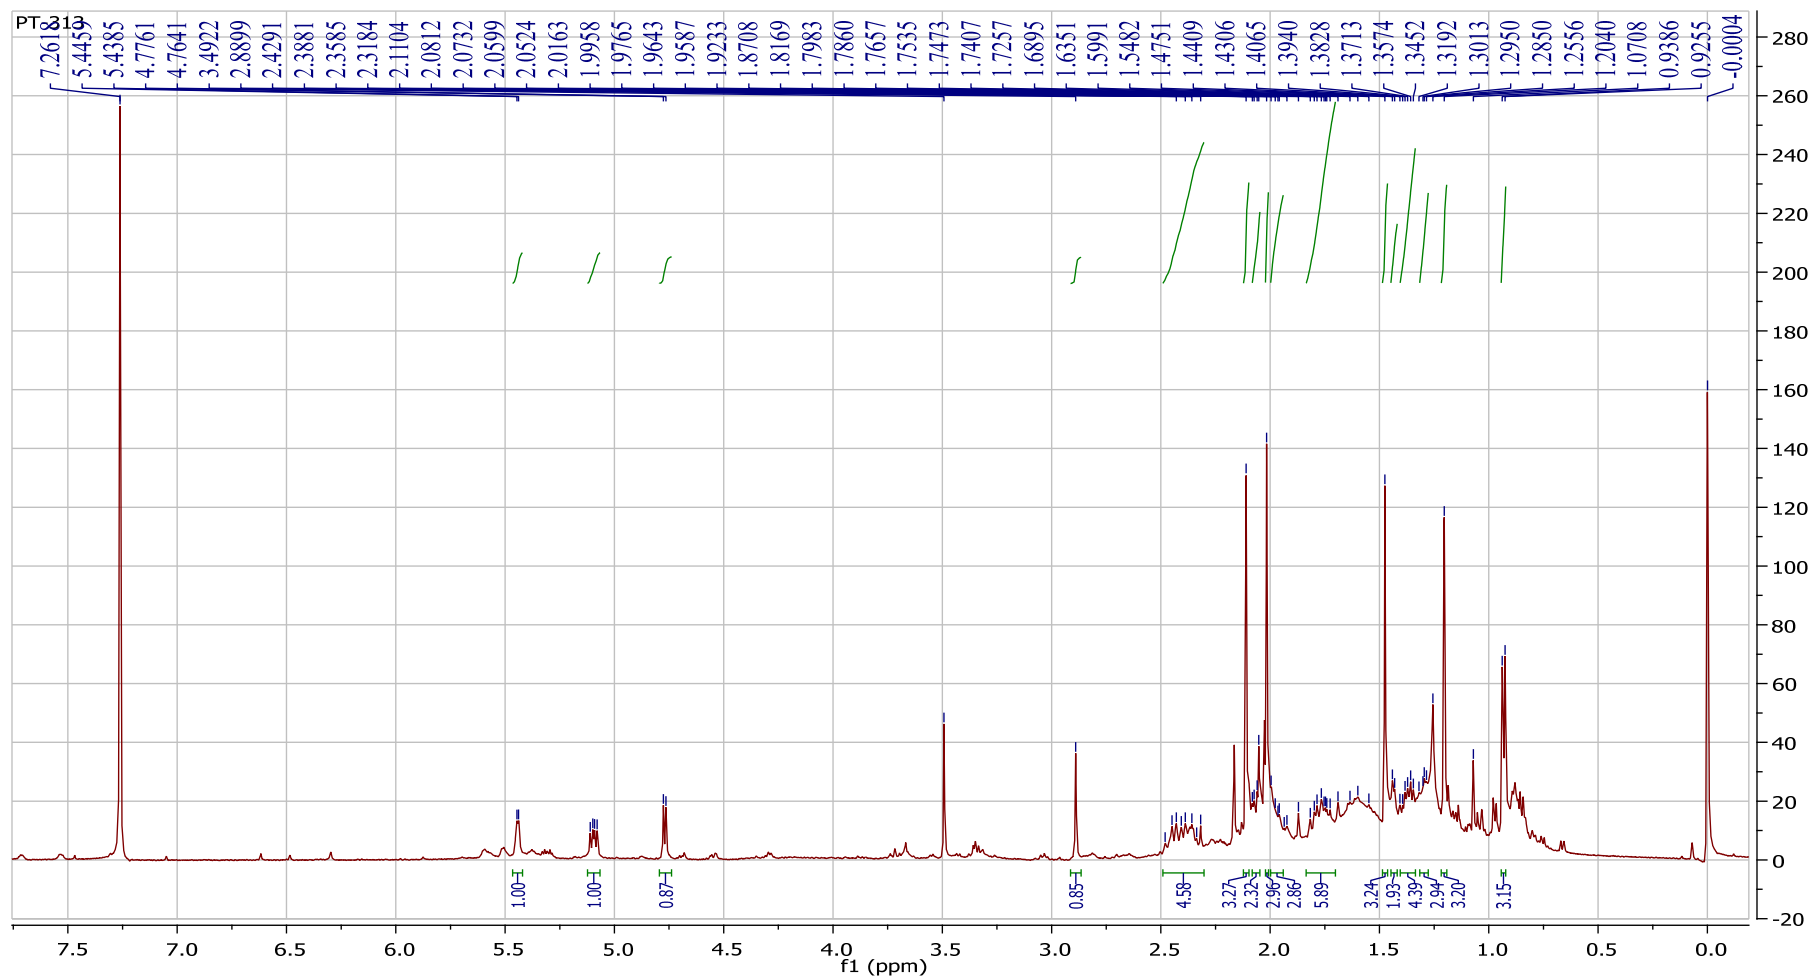

S12:  $^1\text{H}$  NMR of **2**

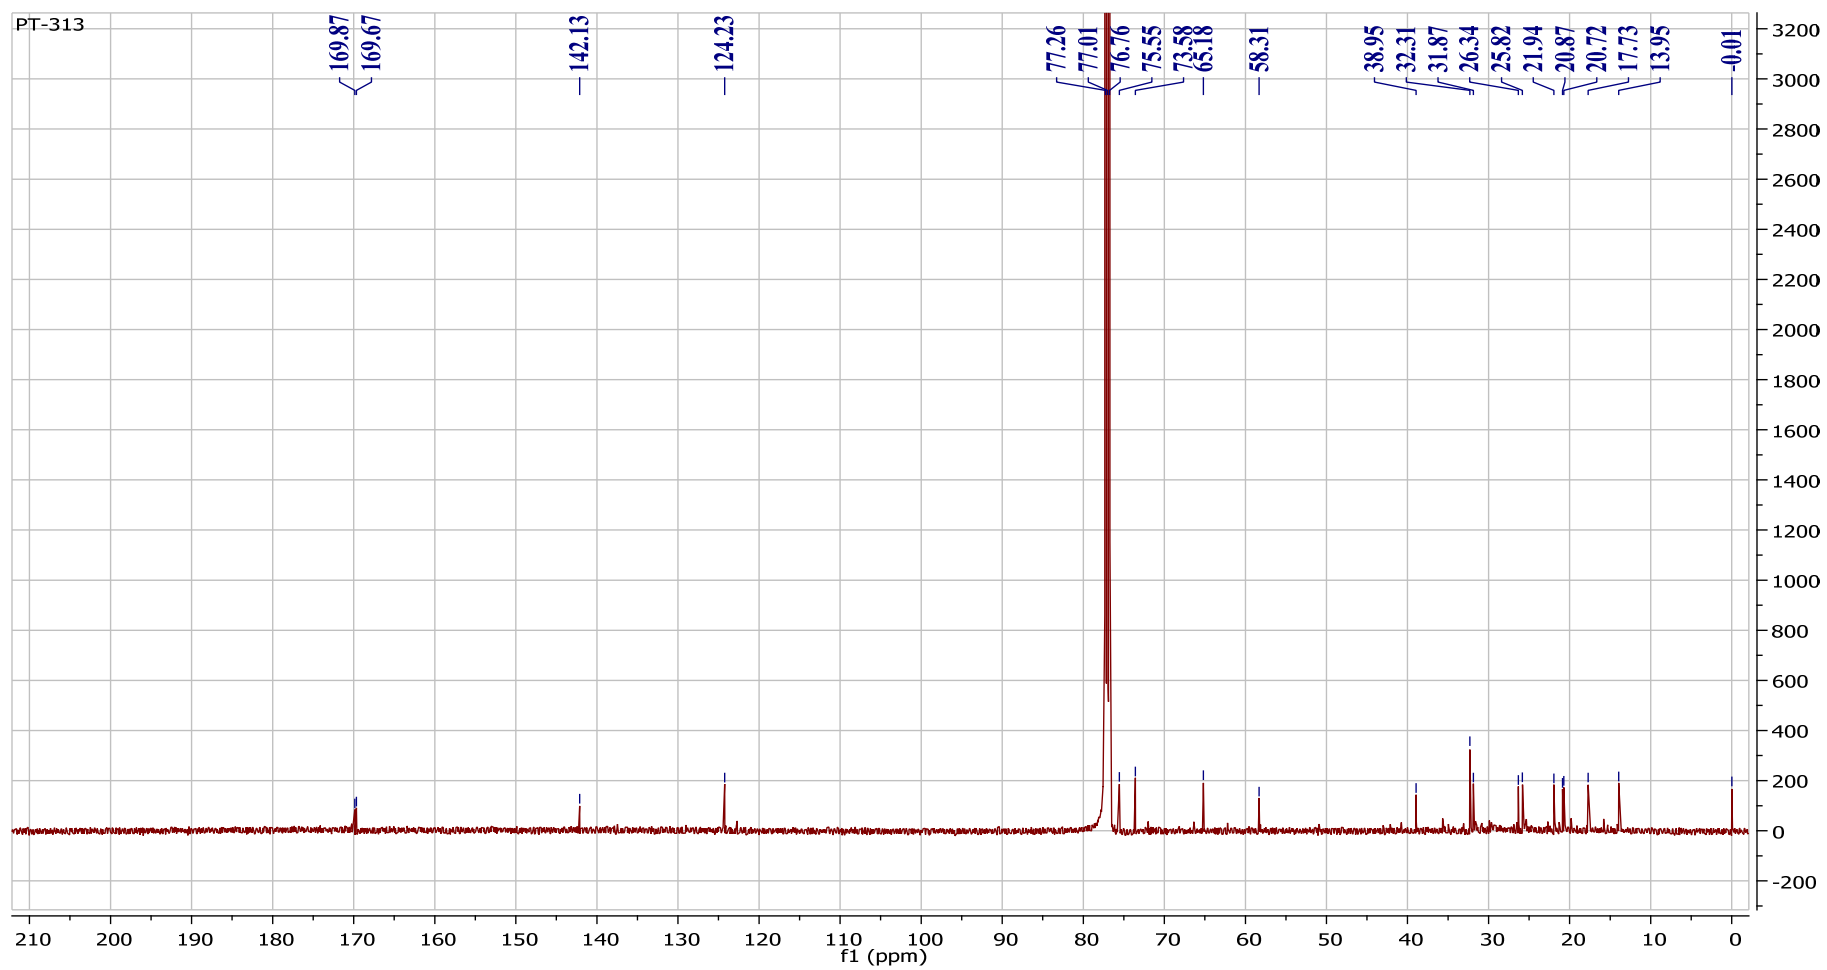

S13:  $^{13}\text{C}$  NMR of **2**

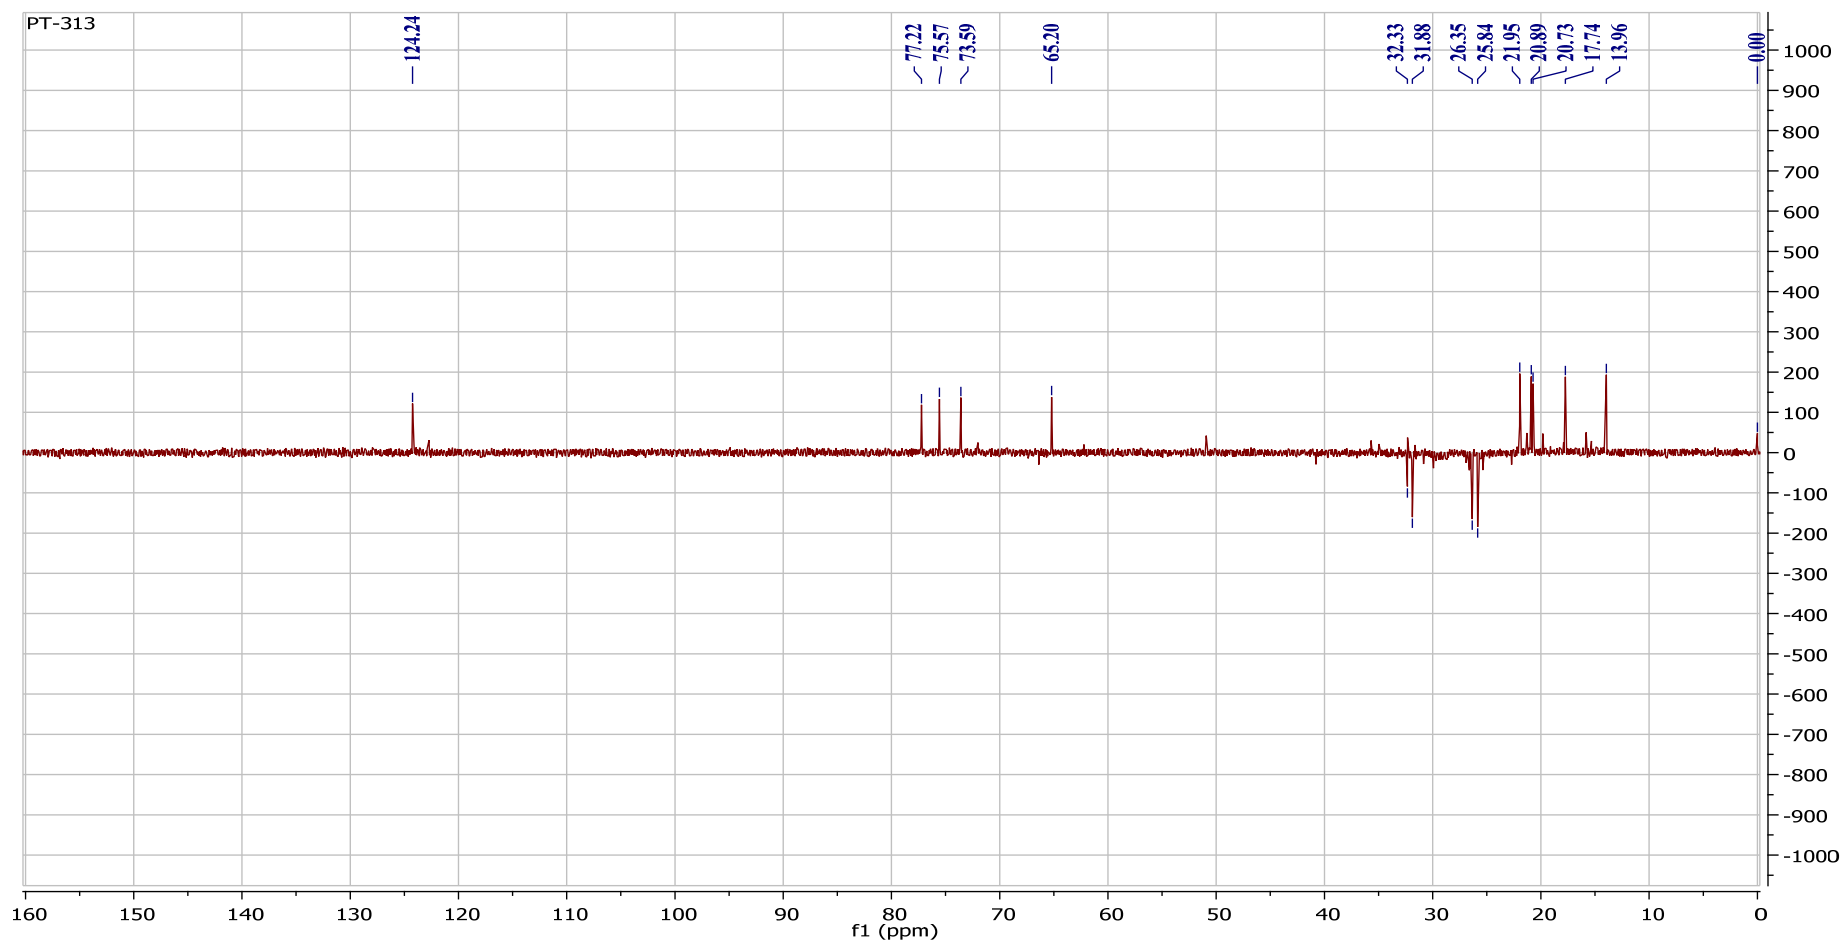

S14: DEPT-135 of 2

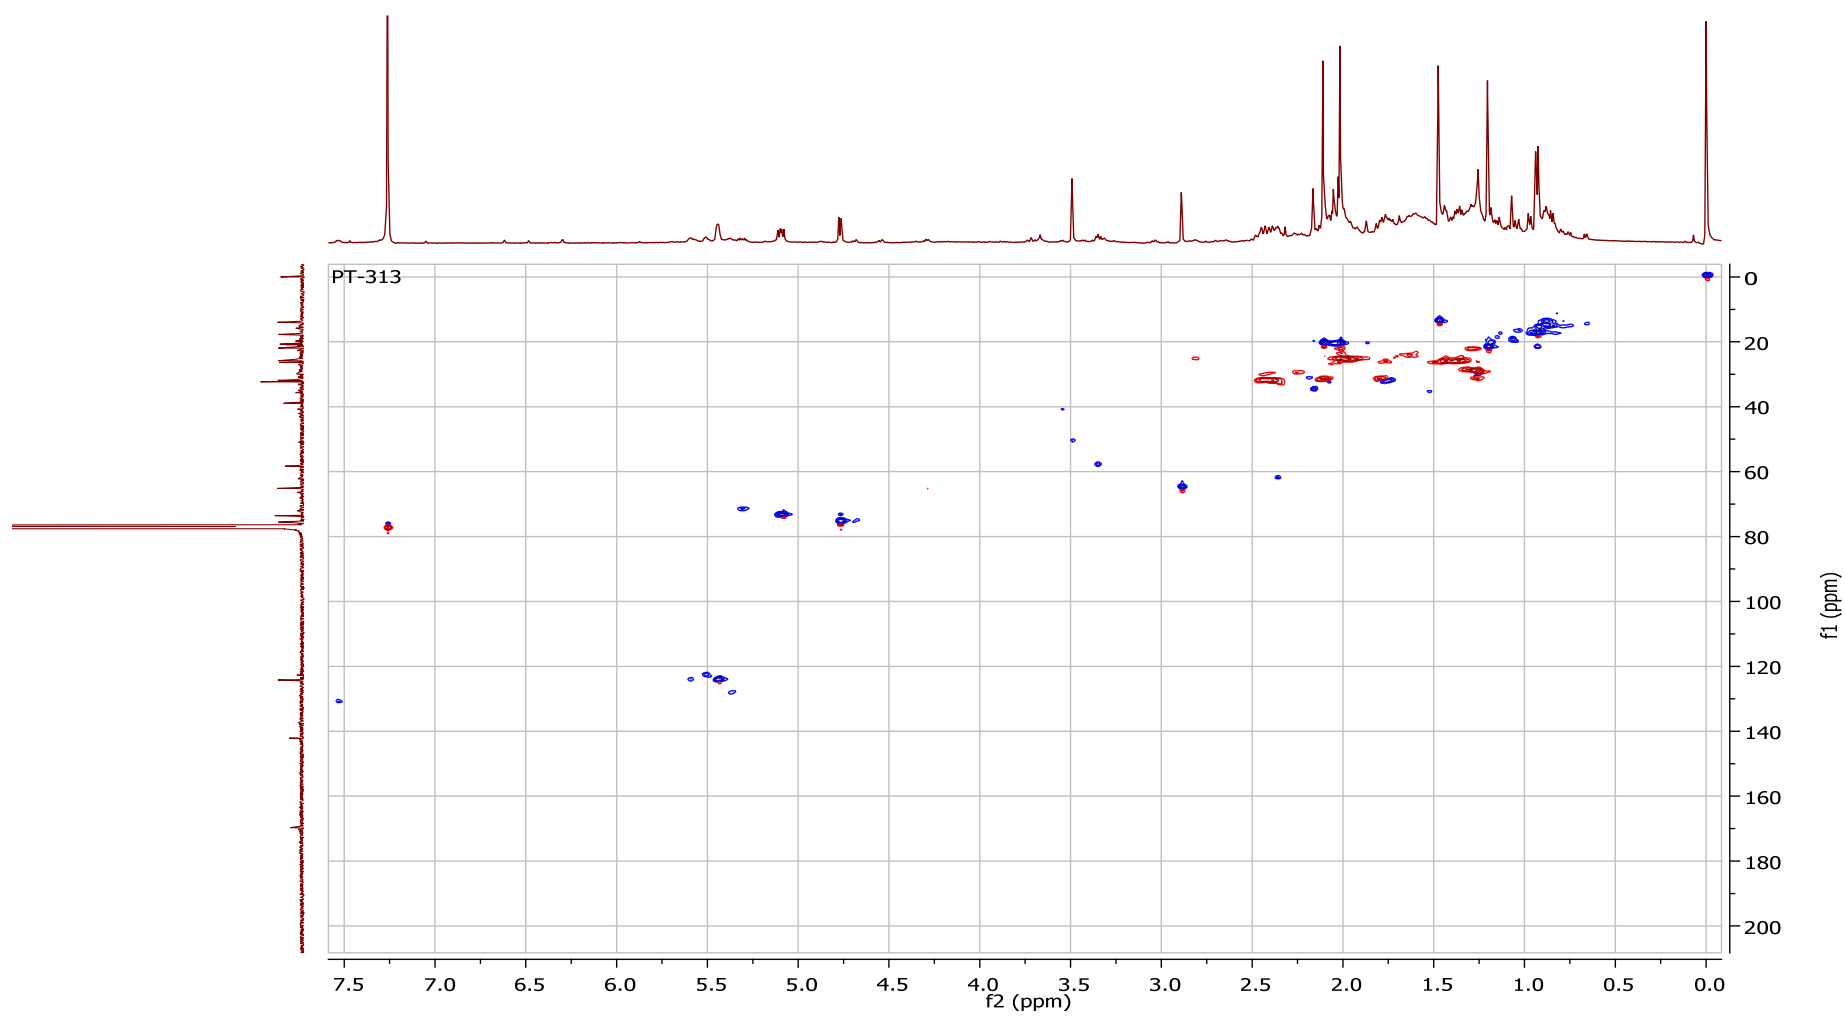

S15: HSQC of **2**

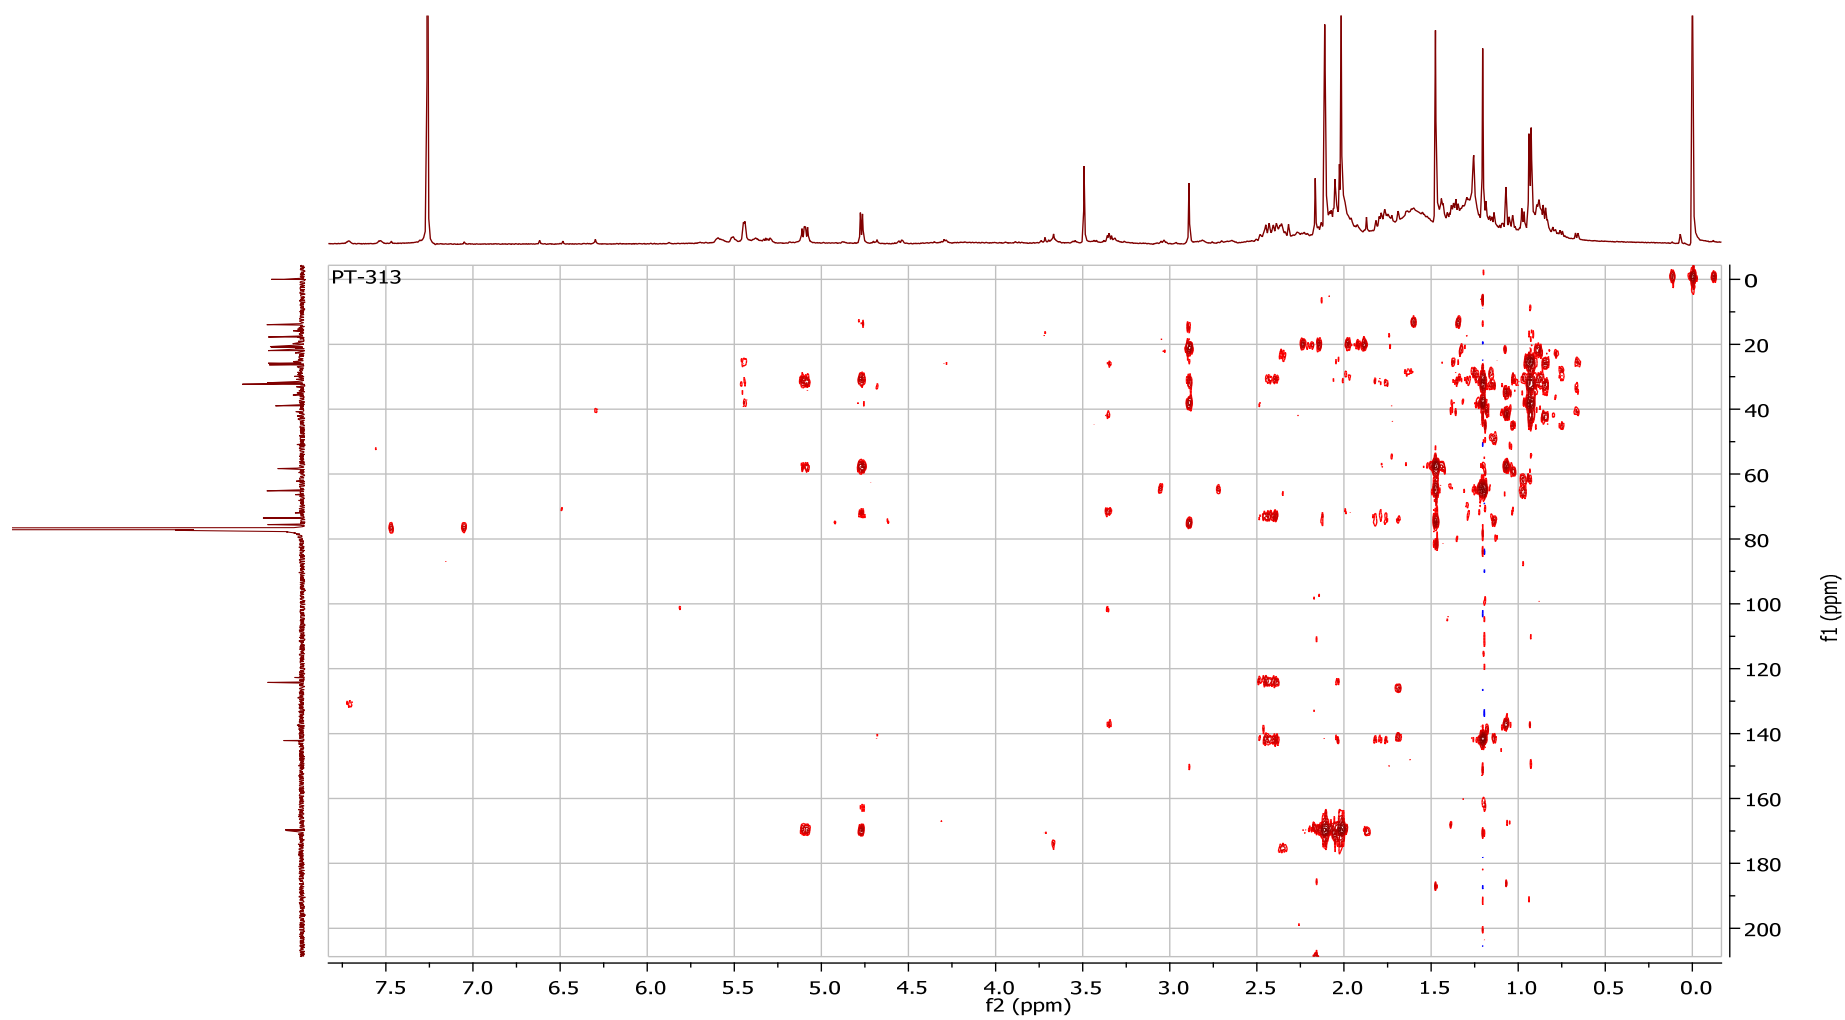

S16: HMBC of **2**

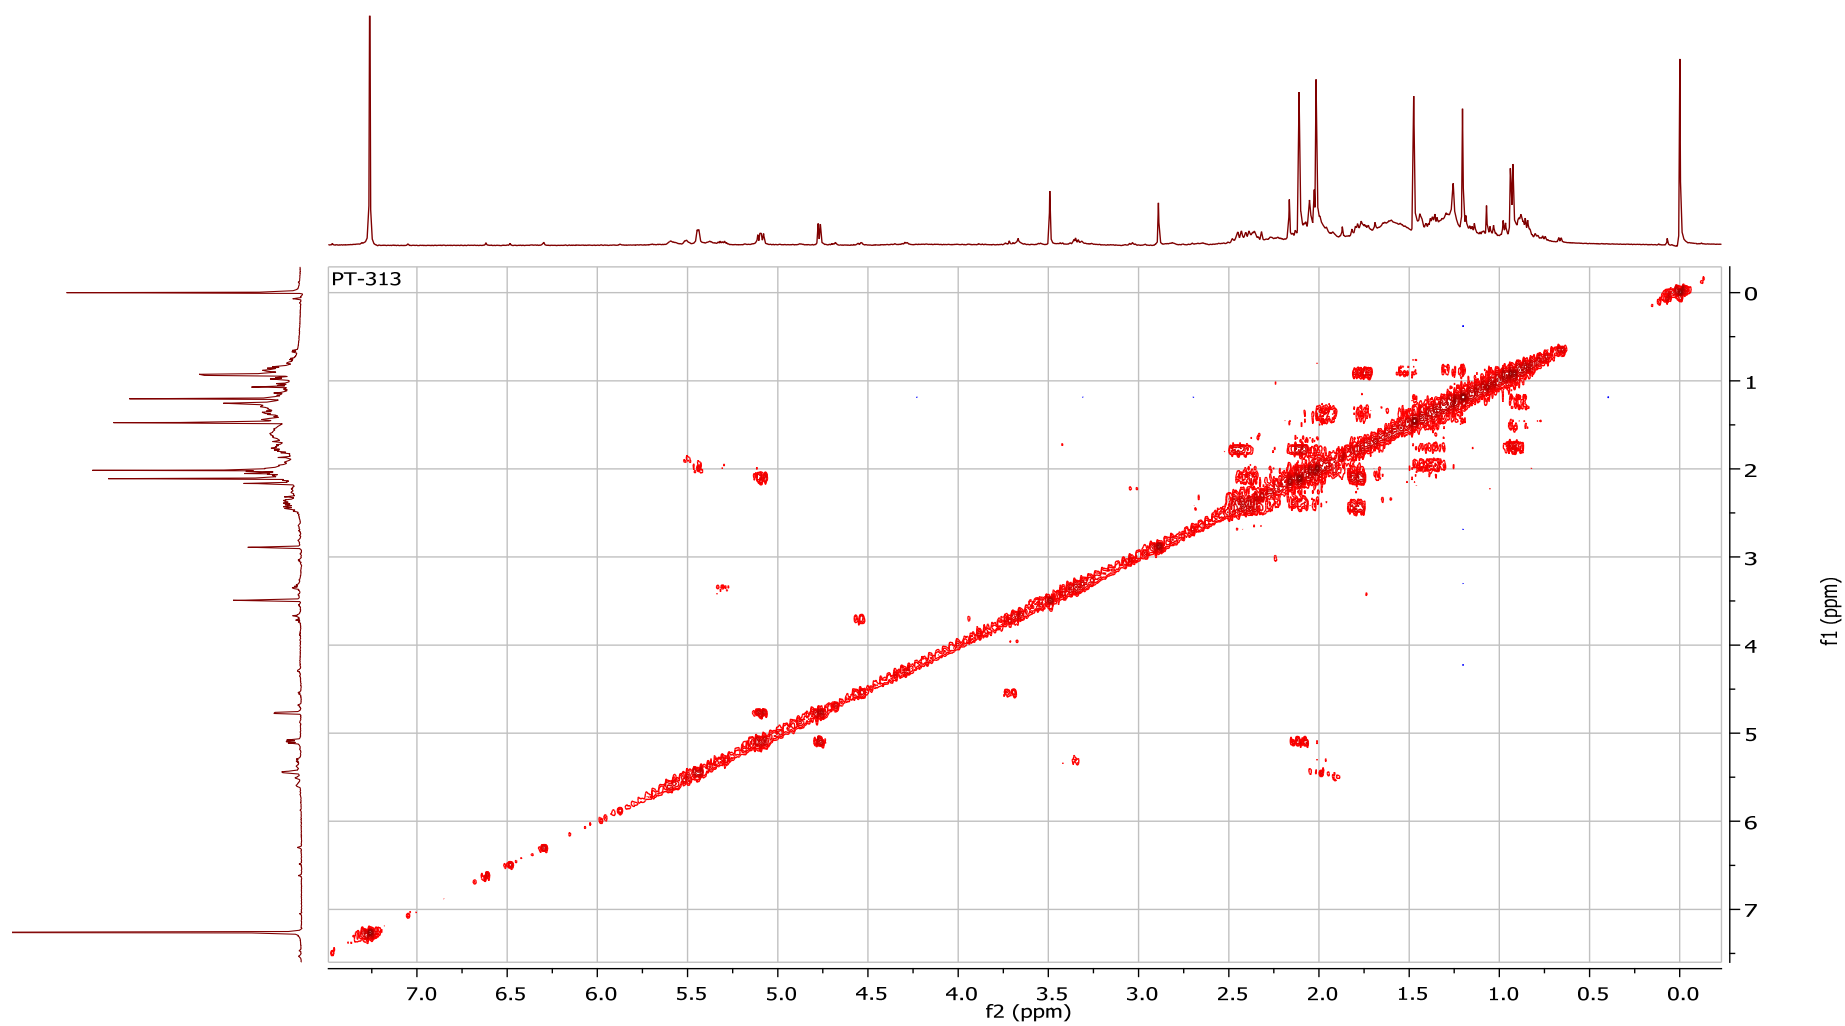

S17:  $^1\text{H}$   $^1\text{H}$  COSY of **2**

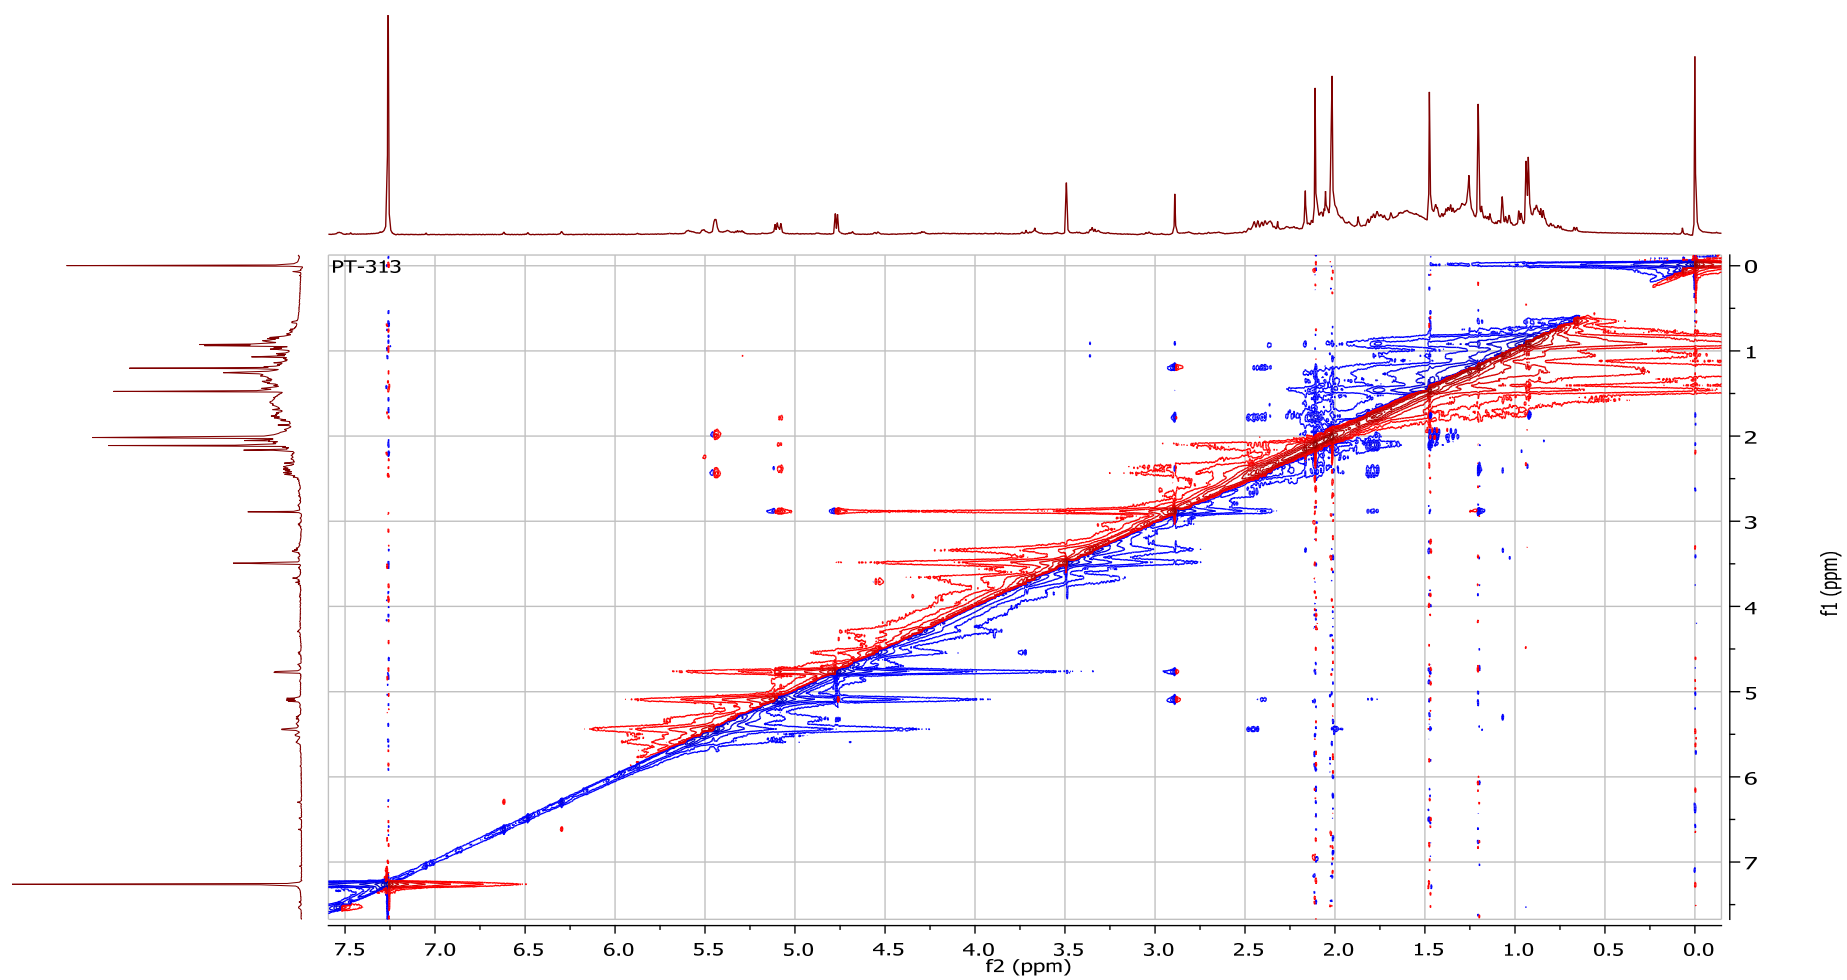

S18: NOESY of **2**

[ Mass Spectrum ]  
Data : Umeyama-Cl.17-Aug-2019.003      Date : 17-Aug-2019 10:37  
Sample : PT-315(CH4)  
Note : MStation  
Inlet : Direct      Ion Mode : CI+  
Spectrum Type : Normal Ion [MF-Linear]  
RT : 0.63 min      Scan# : 24  
BP : m/z 218      Int. : 399.99 (4194240)  
Output m/z range : 35 to 500      Cut Level : 0.00 %

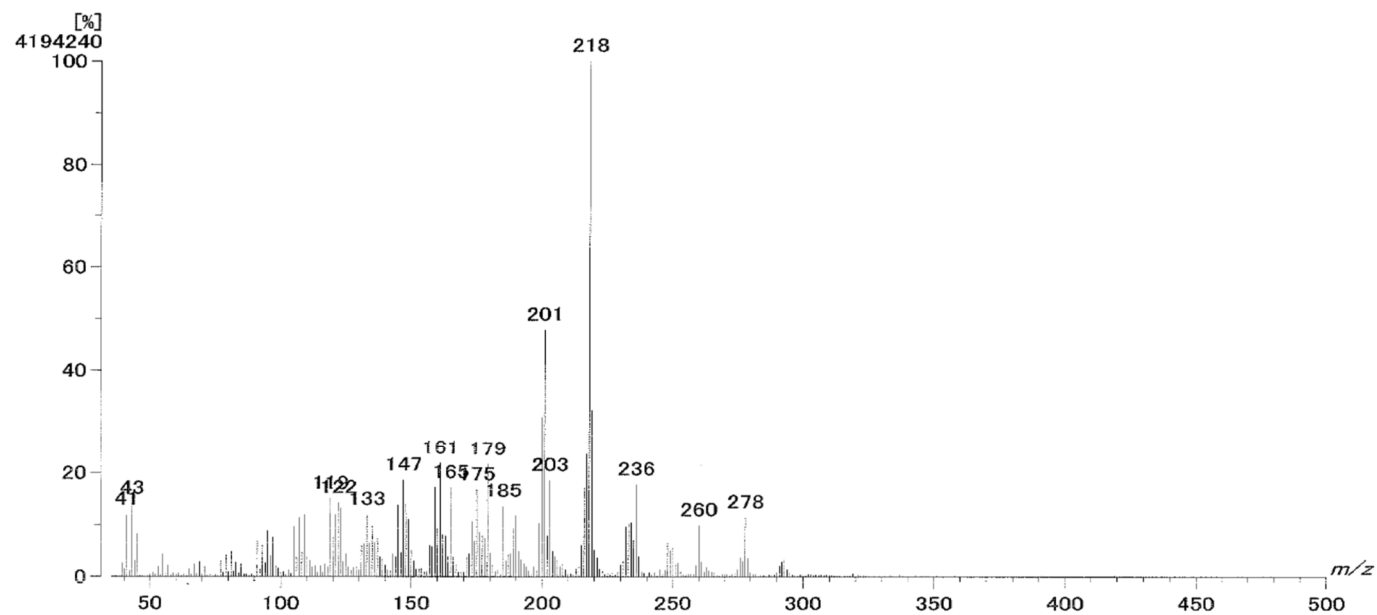

S19: LRCIMS of 3





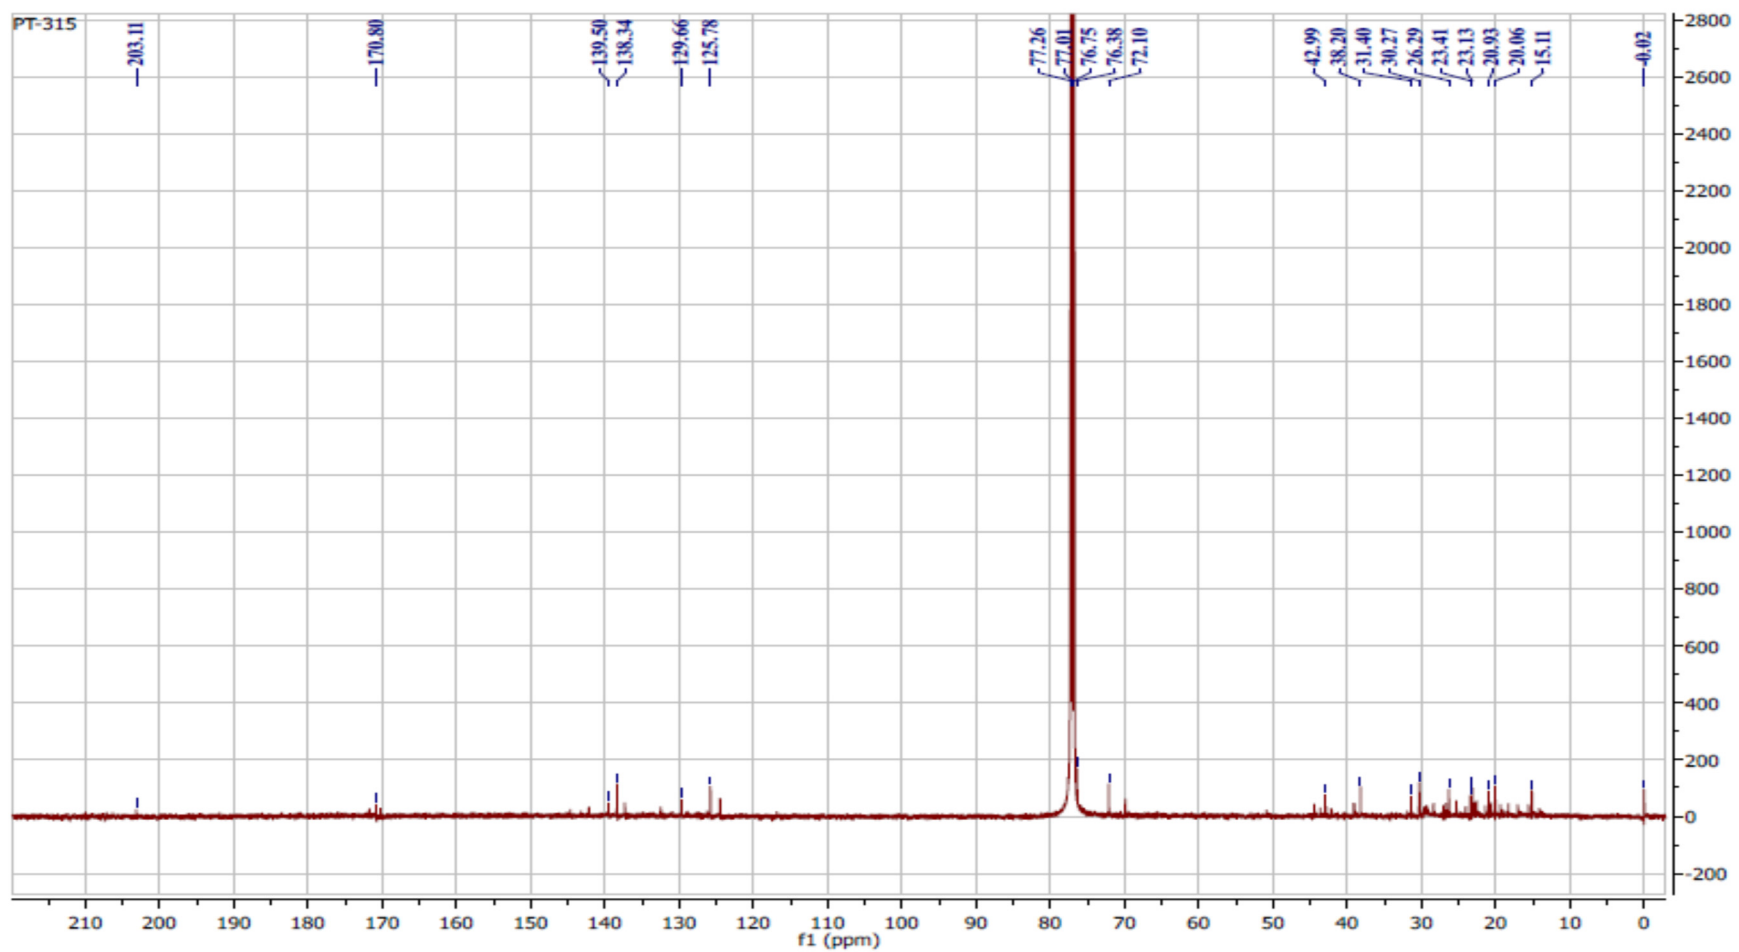

S21:  $^{13}\text{C}$ -NMR of **3**

[ Mass Spectrum ]

Data : Umeyama-Cl.29-Jul-2019.002      Date : 29-Jul-2019 08:27

Sample : PT-316(CH4)

Note : MStation

Inlet : Direct      Ion Mode : CI+

Spectrum Type : Normal Ion [MF-Linear]

RT : 0.55 min      Scan# : 21

BP : m/z 200      Int. : 399.99 (4194240)

Output m/z range : 35 to 500      Cut Level : 0.00 %

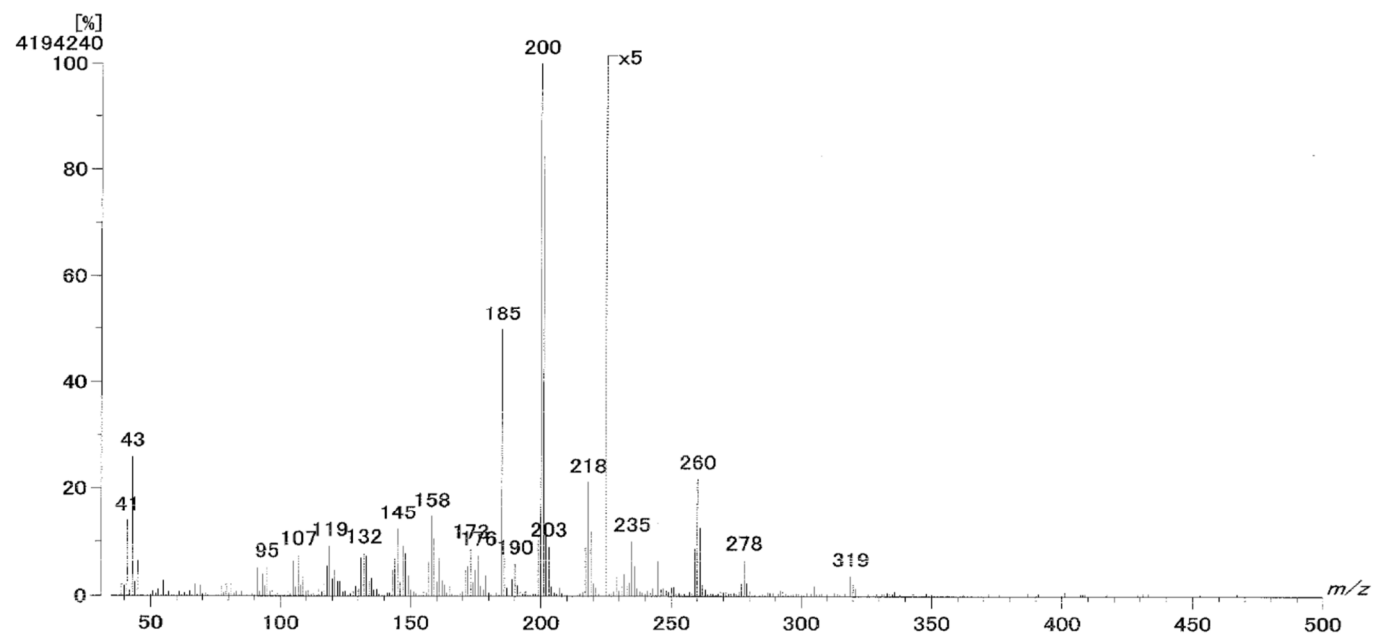

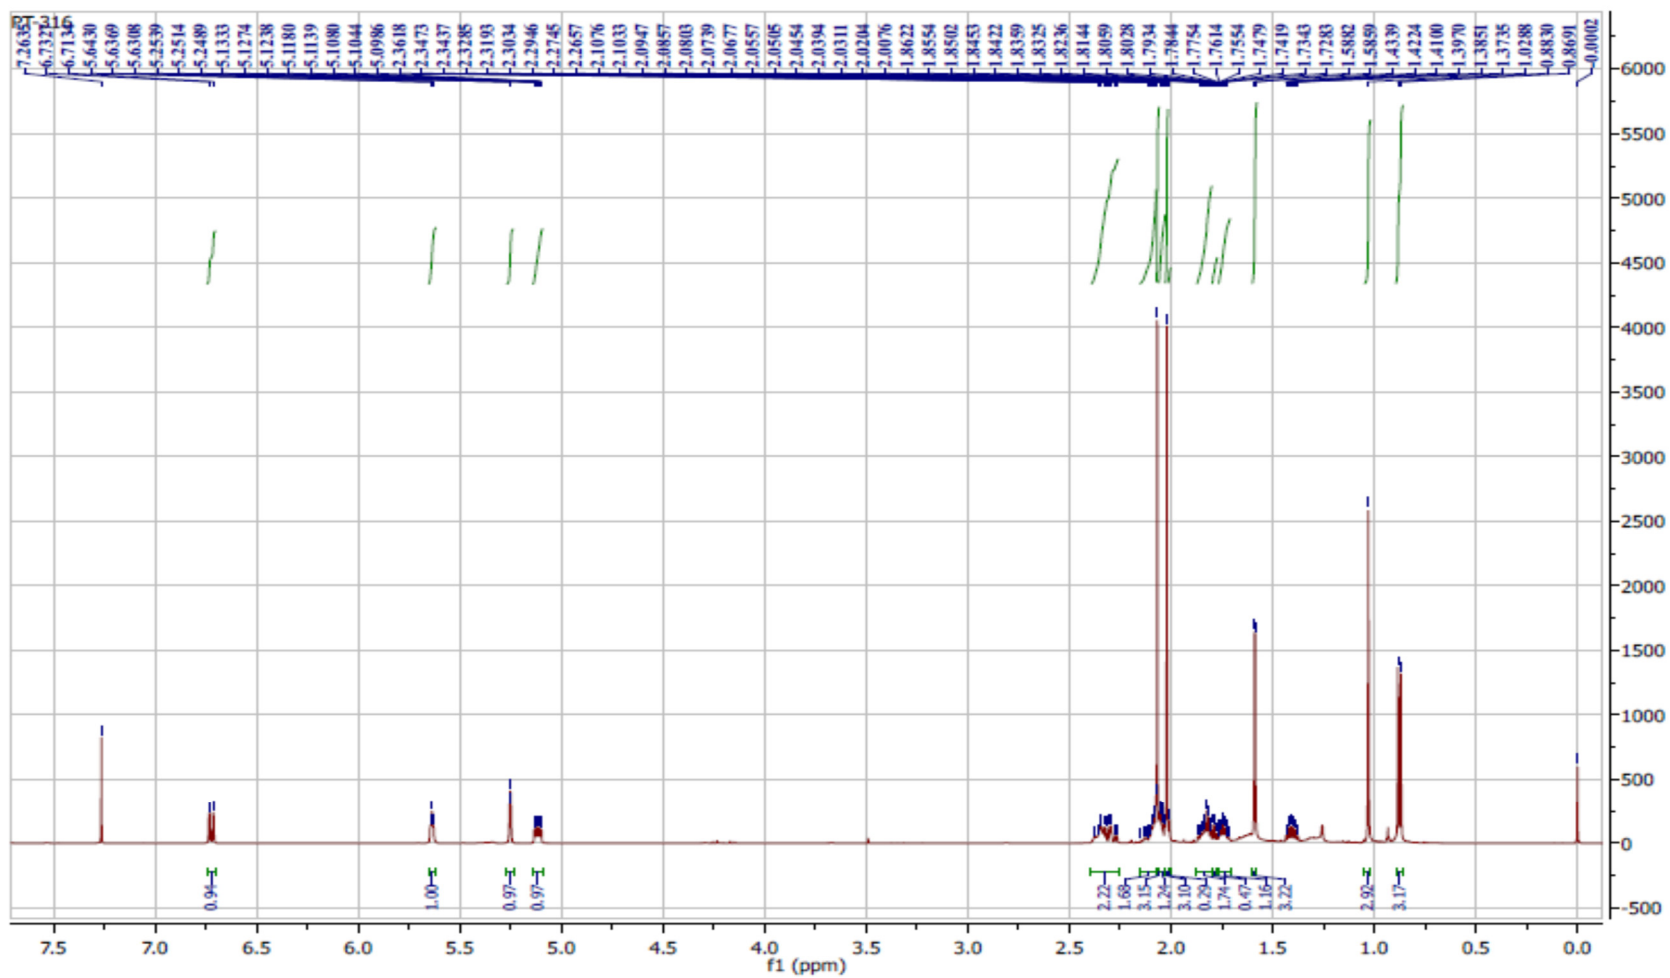

$^1\text{H}$ -

S23: NMR of 4

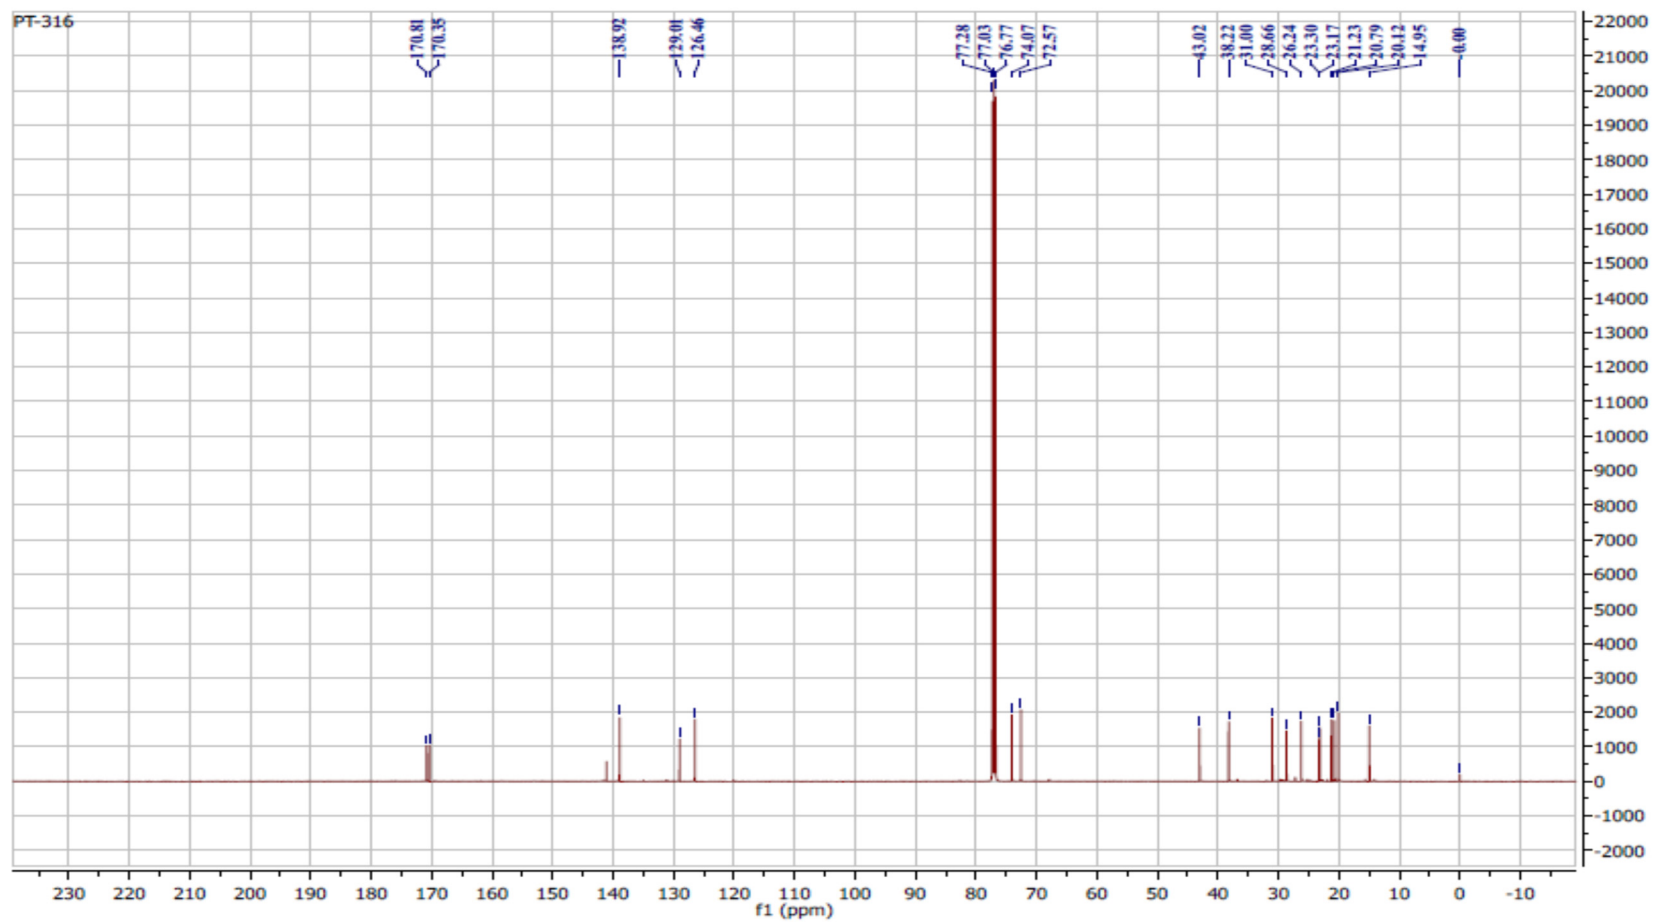

S24:  $^{13}\text{C}$ -NMR of 4

[ Mass Spectrum ]

Data : Umeyama-EI.22-Jul-2019.001      Date : 22-Jul-2019 09:59

Sample : PT-311

Note : MStation

Inlet : Direct      Ion Mode : EI+

Spectrum Type : Normal Ion [MF-Linear]

RT : 0.60 min      Scan# : 19

BP : m/z 203      Int. : 1062.04 (11136256)

Output m/z range : 35 to 500      Cut Level : 0.00 %

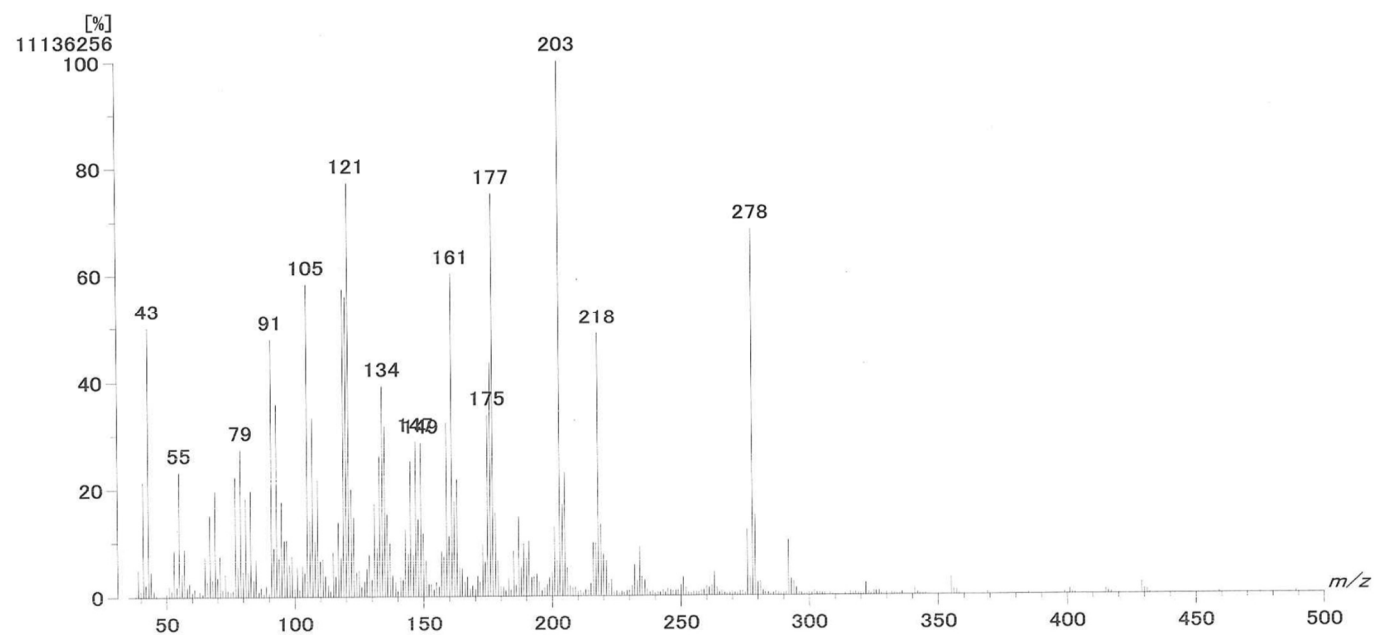

S25: LRCIMS of 5

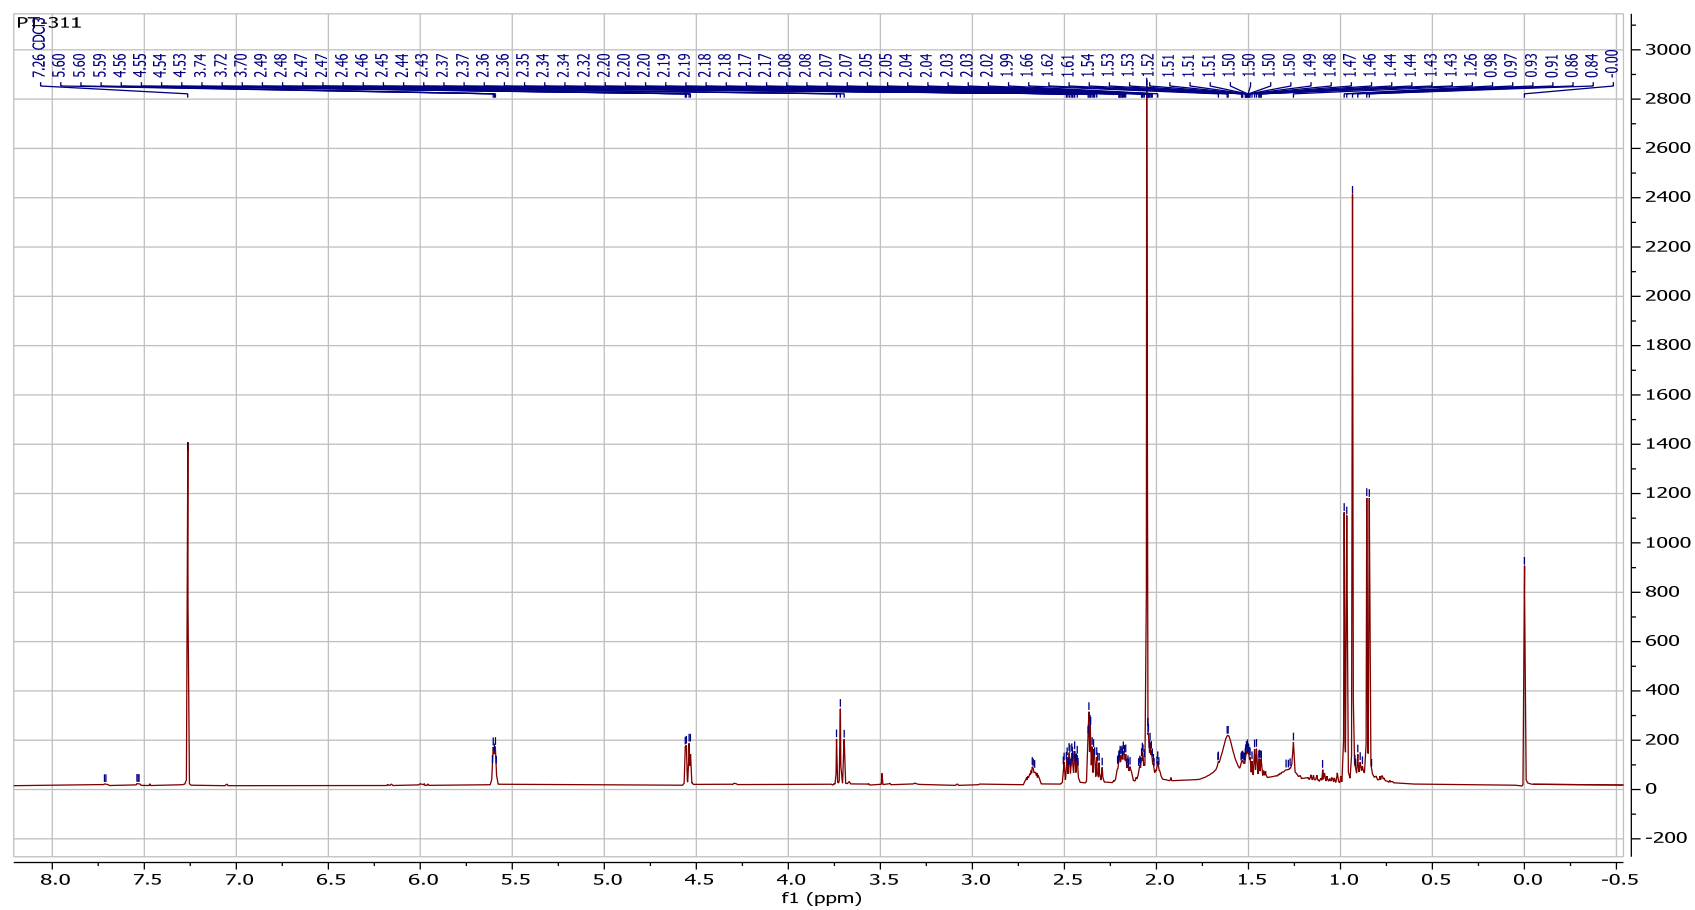

S26:  $^1\text{H}$ -NMR of **5**

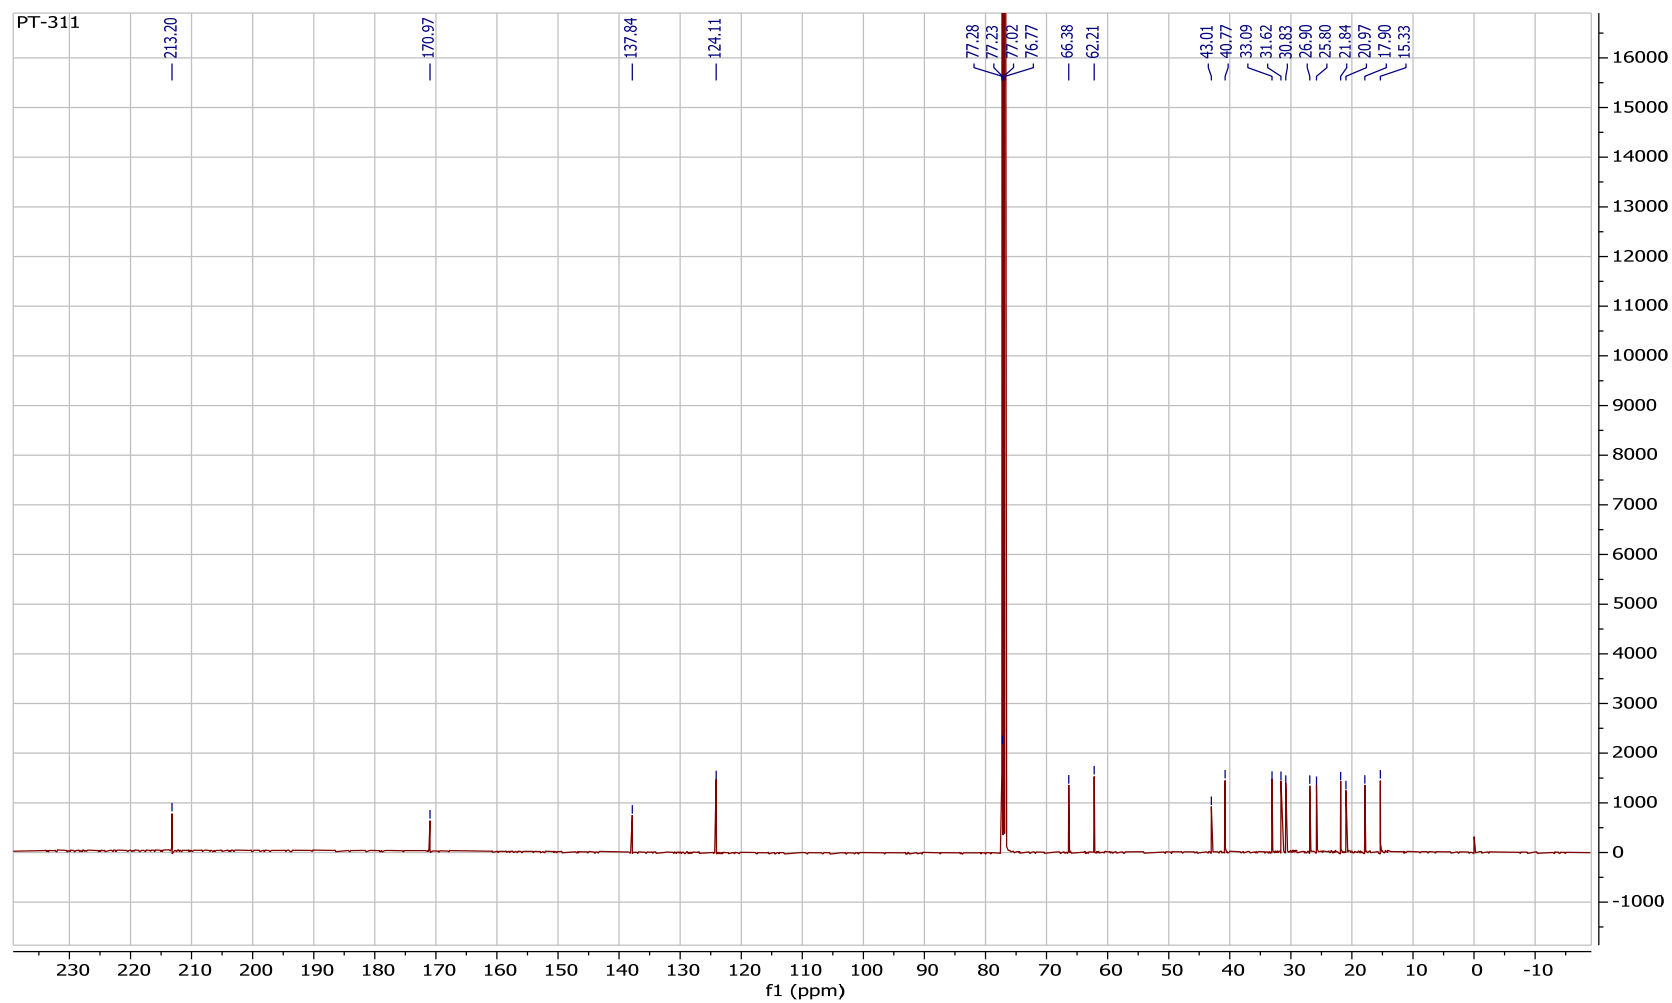

S27:  $^{13}\text{C}$ -NMR of **5**



[ Mass Spectrum ]  
Data : Umeyama-El01-Aug-2019.001      Date : 01-Aug-2019 07:58  
Sample : PT-310  
Note : MStation  
Inlet : Direct      Ion Mode : EI+  
Spectrum Type : Normal Ion [MF-Linear]  
RT : 0.50 min      Scan# : 16  
BP : m/z 161      Int. : 1599.98 (16776960)  
Output m/z range : 35 to 500      Cut Level : 0.00 %

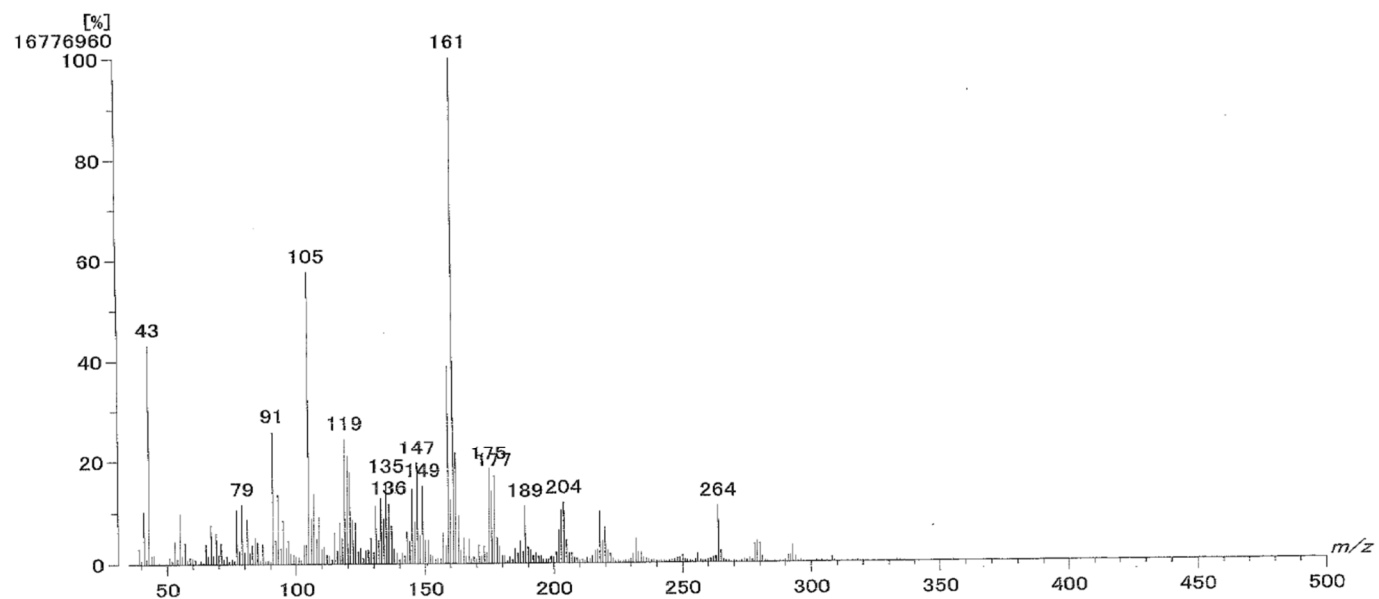

S28: LRCIMS EI-MS of 6

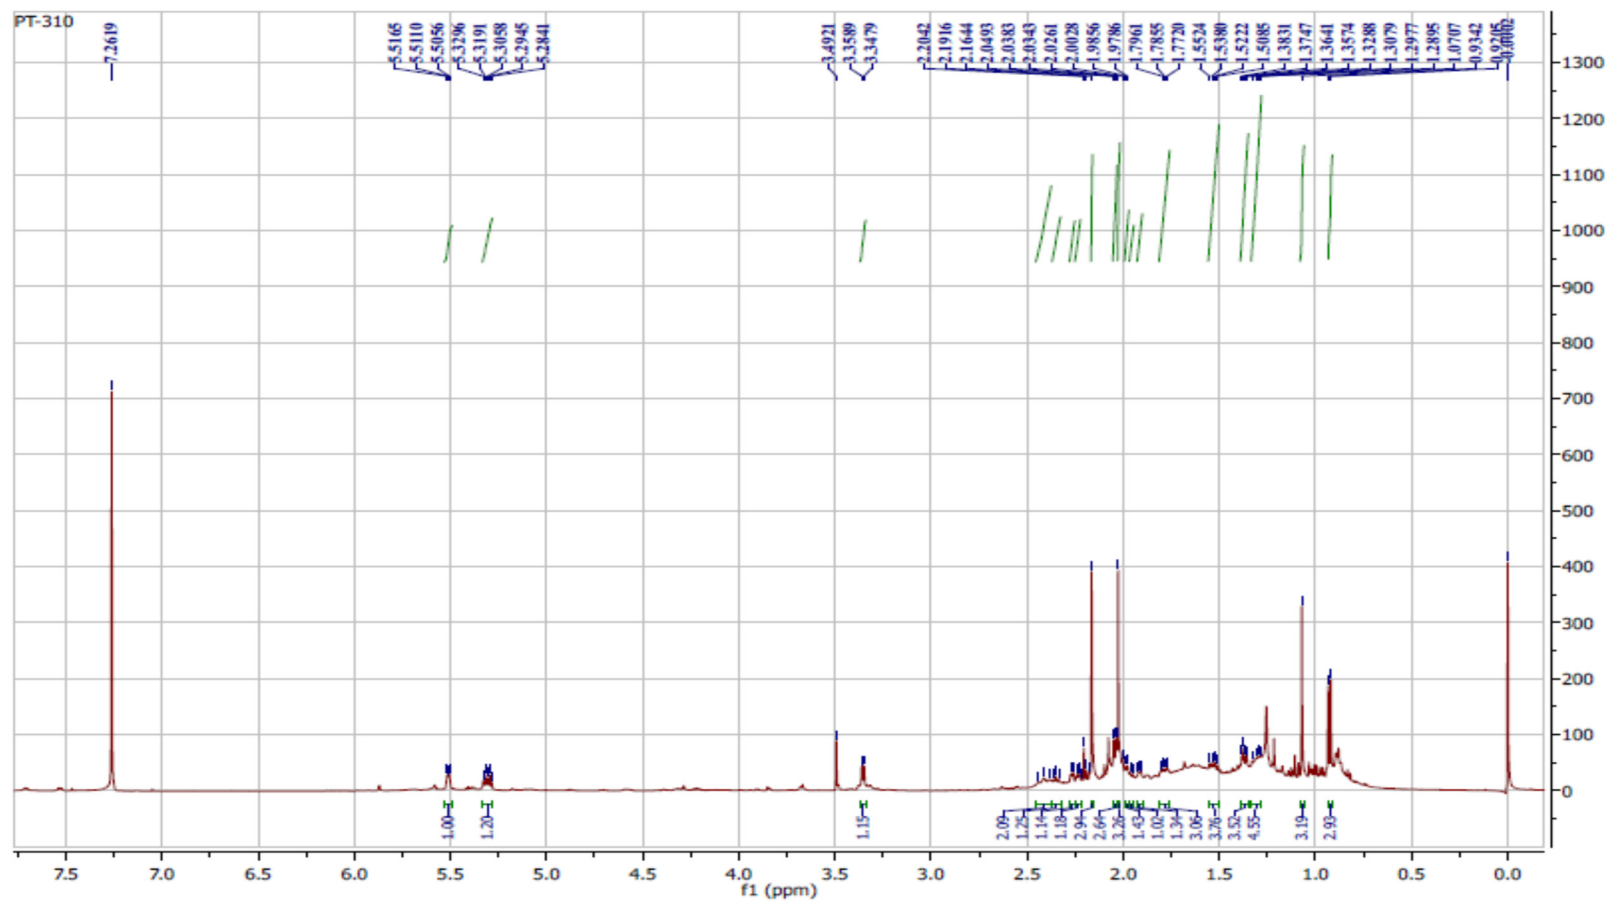

S29:  $^1\text{H}$ -NMR of **6**

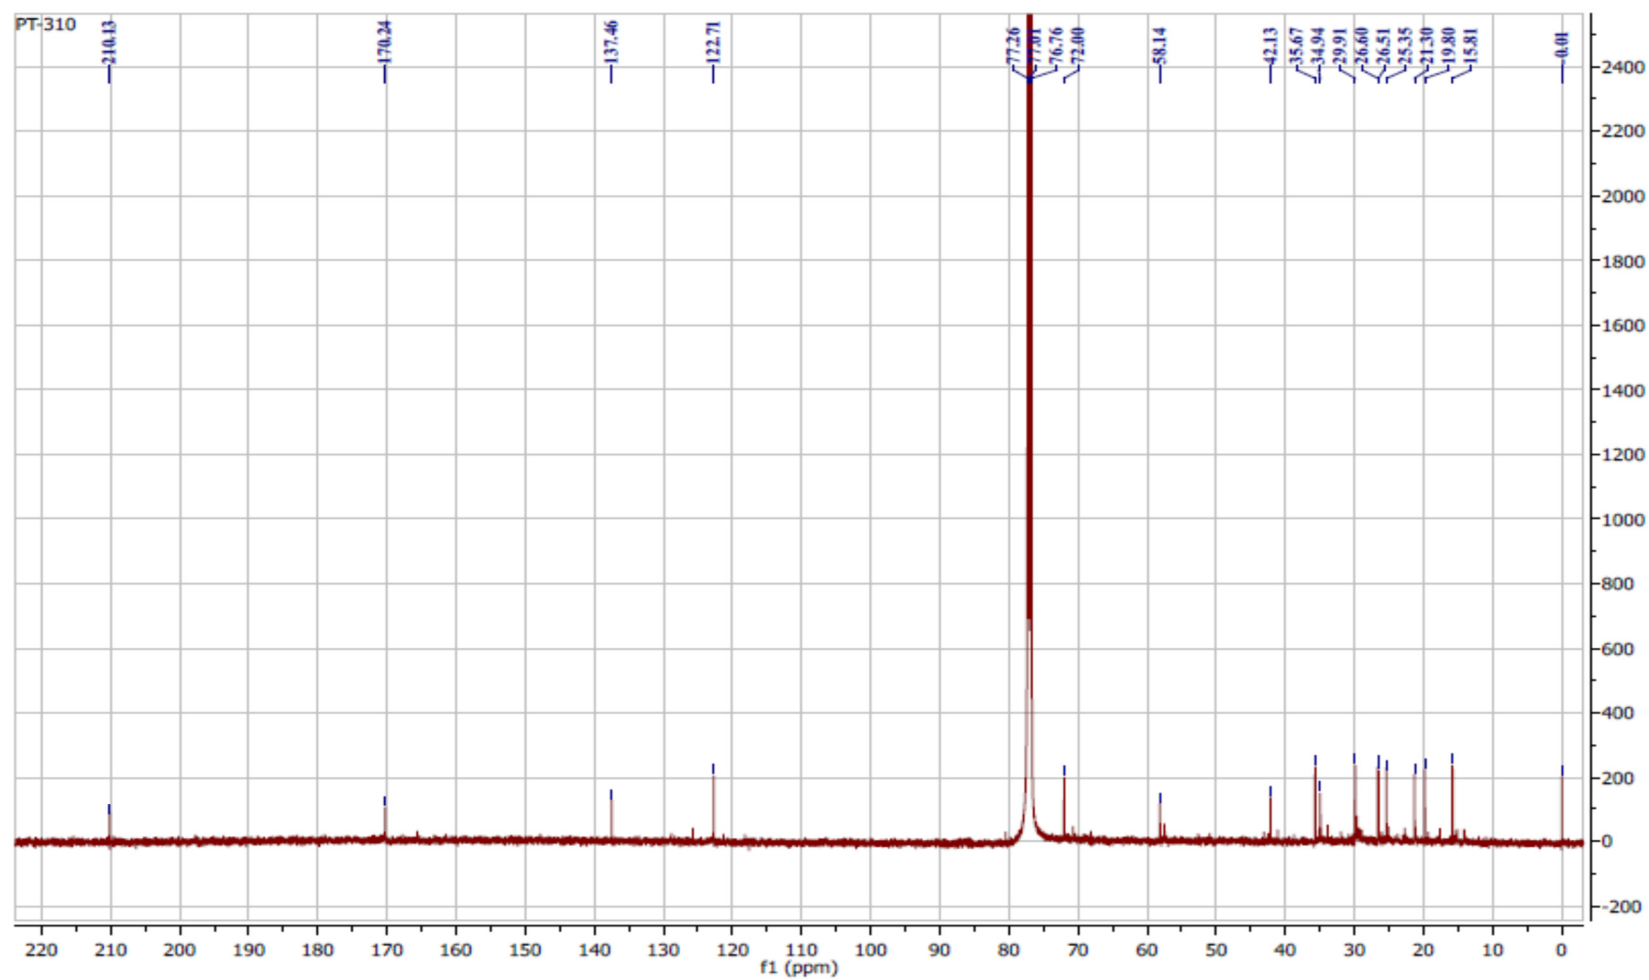

S30:  $^{13}\text{C}$ -NMR of **6**

[ Mass Spectrum ]  
Data : Umeyama-C117-Aug-2019.004      Date : 17-Aug-2019 10:44  
Sample : PT-39(CH4)  
Note : MStation  
Inlet : Direct      Ion Mode : CI+  
Spectrum Type : Normal Ion [MF-Linear]  
RT : 0.79 min      Scan# : 30  
BP : m/z 233      Int. : 114.96 (1205440)  
Output m/z range : 35 to 500      Cut Level : 0.00 %

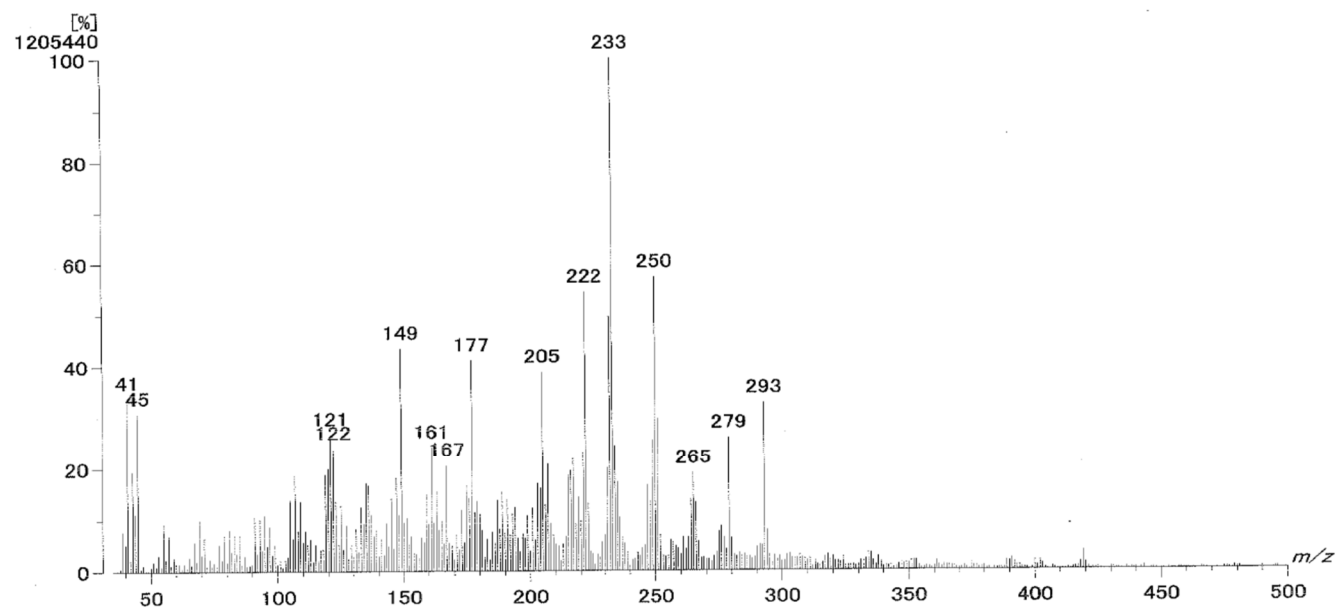

S31: LRCIMS EI-MS of 7

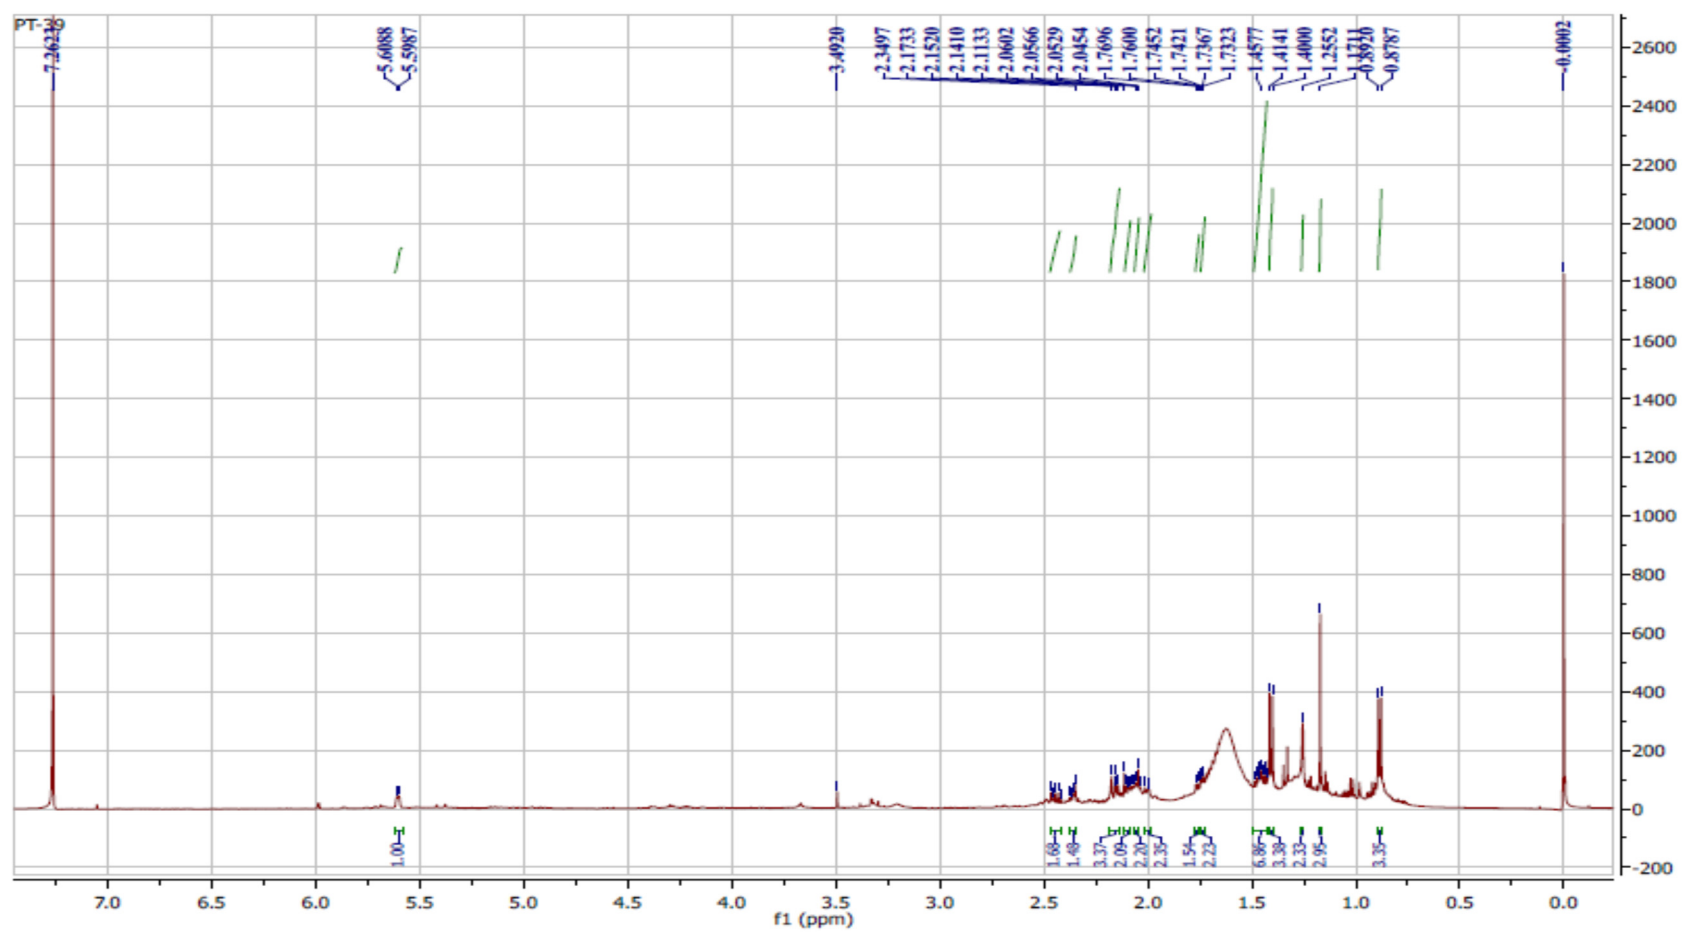

S32:  $^1\text{H}$ -NMR of **7**

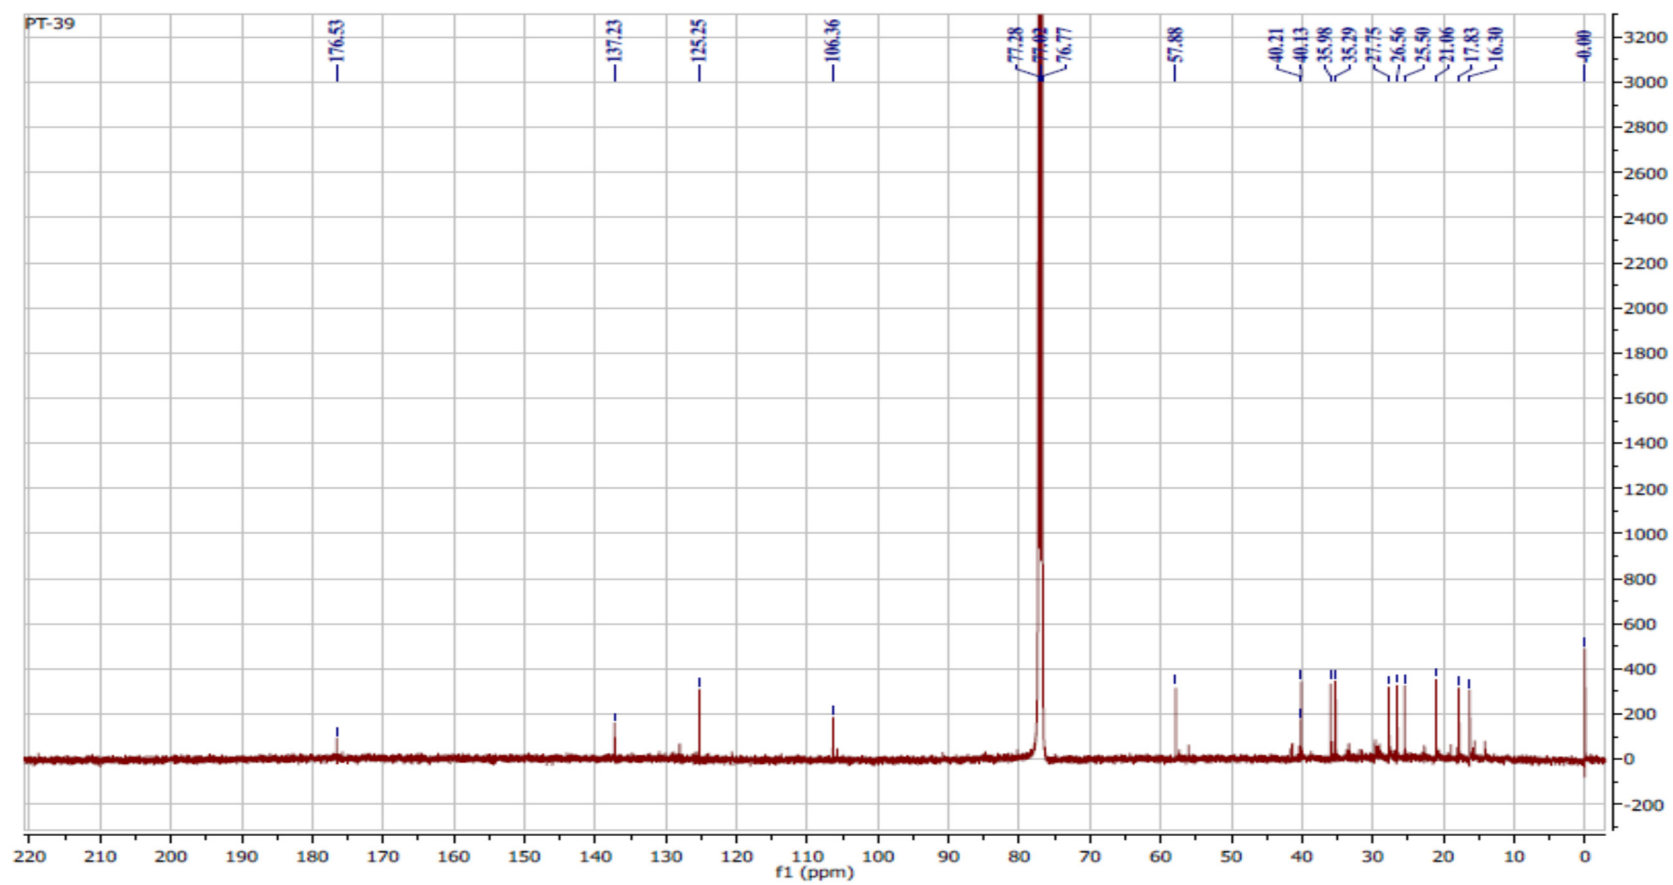

S33:  $^{13}\text{C}$ -NMR of **7**

[ Mass Spectrum ]

Data : Umeyama-EL17-Jul-2019.004 Date : 17-Jul-2019 15:21

Sample : PT-42

Note : MStation

Inlet : Direct Ion Mode : EI+

Spectrum Type : Normal Ion [MF-Linear]

RT : 0.50 min Scan# : 16

BP : m/z 43 Int. : 1466.07 (15372800)

Output m/z range : 35 to 500 Cut Level : 0.00 %

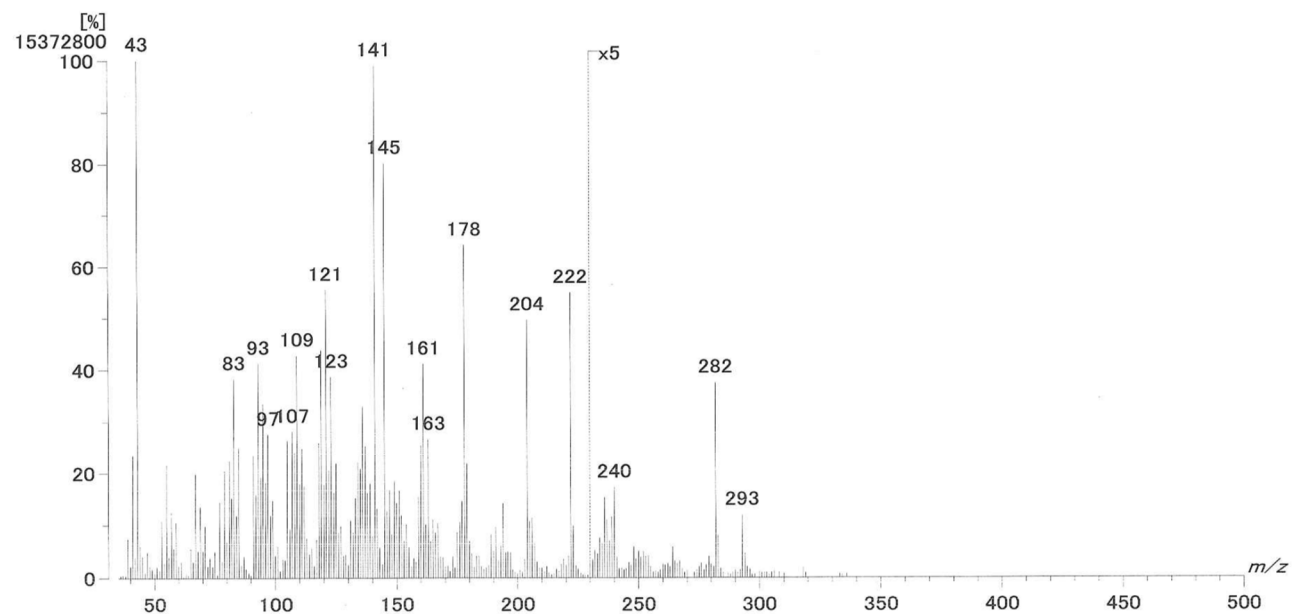

S34:LRCIMS EI-MS of **8**

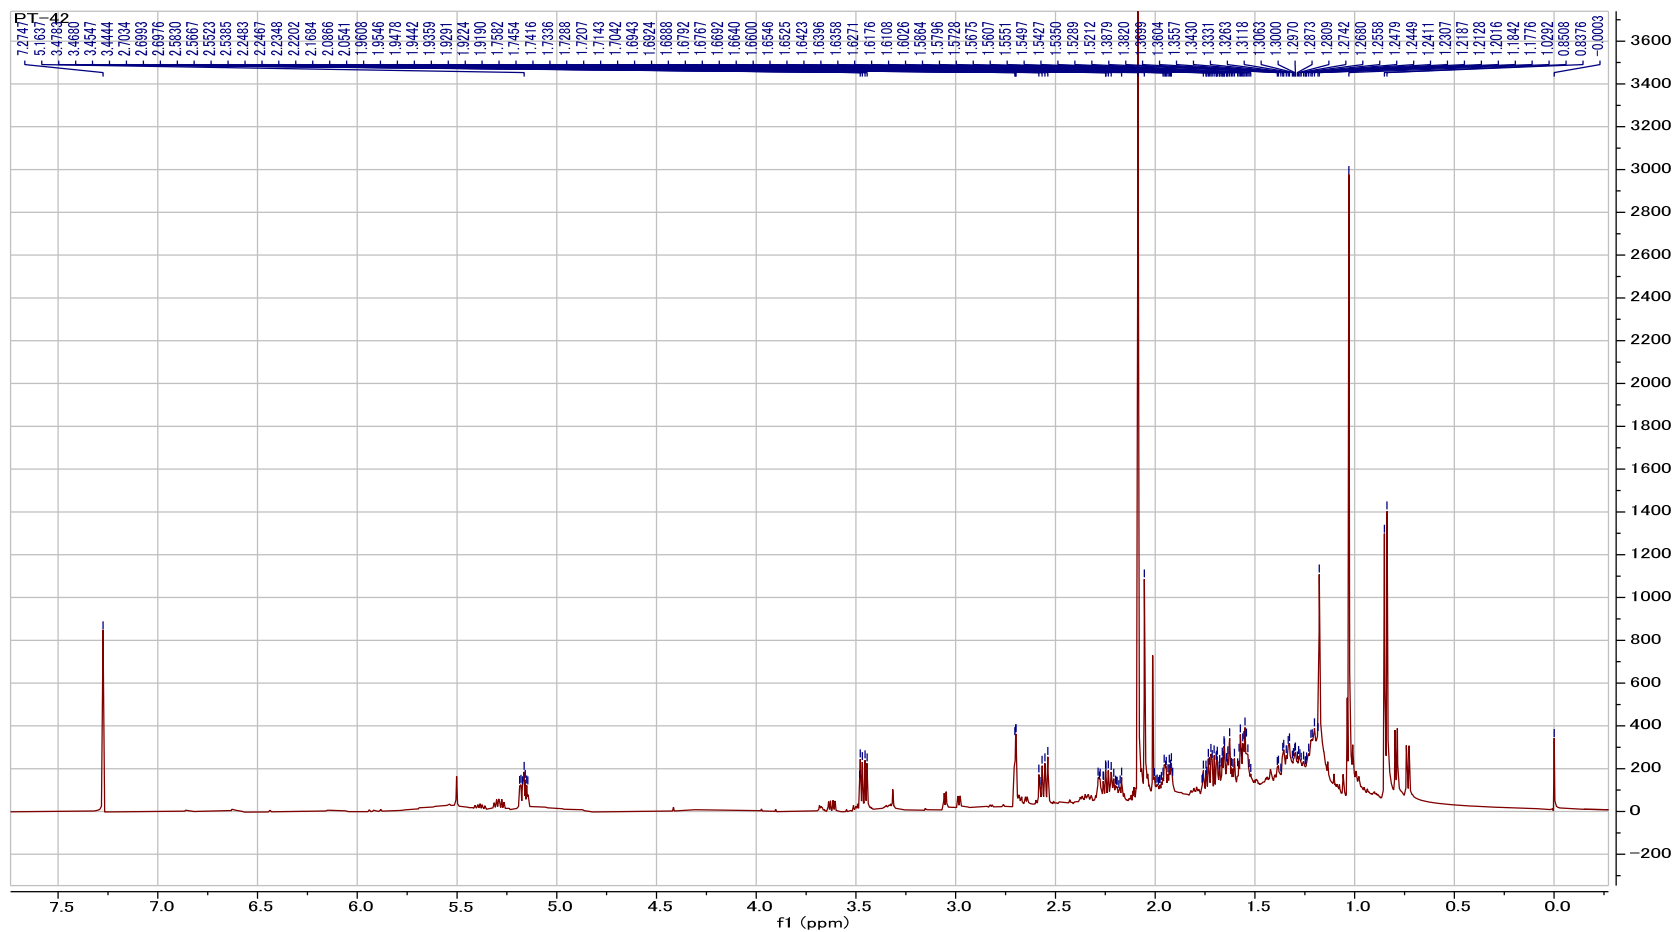

S35:  $^1\text{H}$ -NMR of **8**



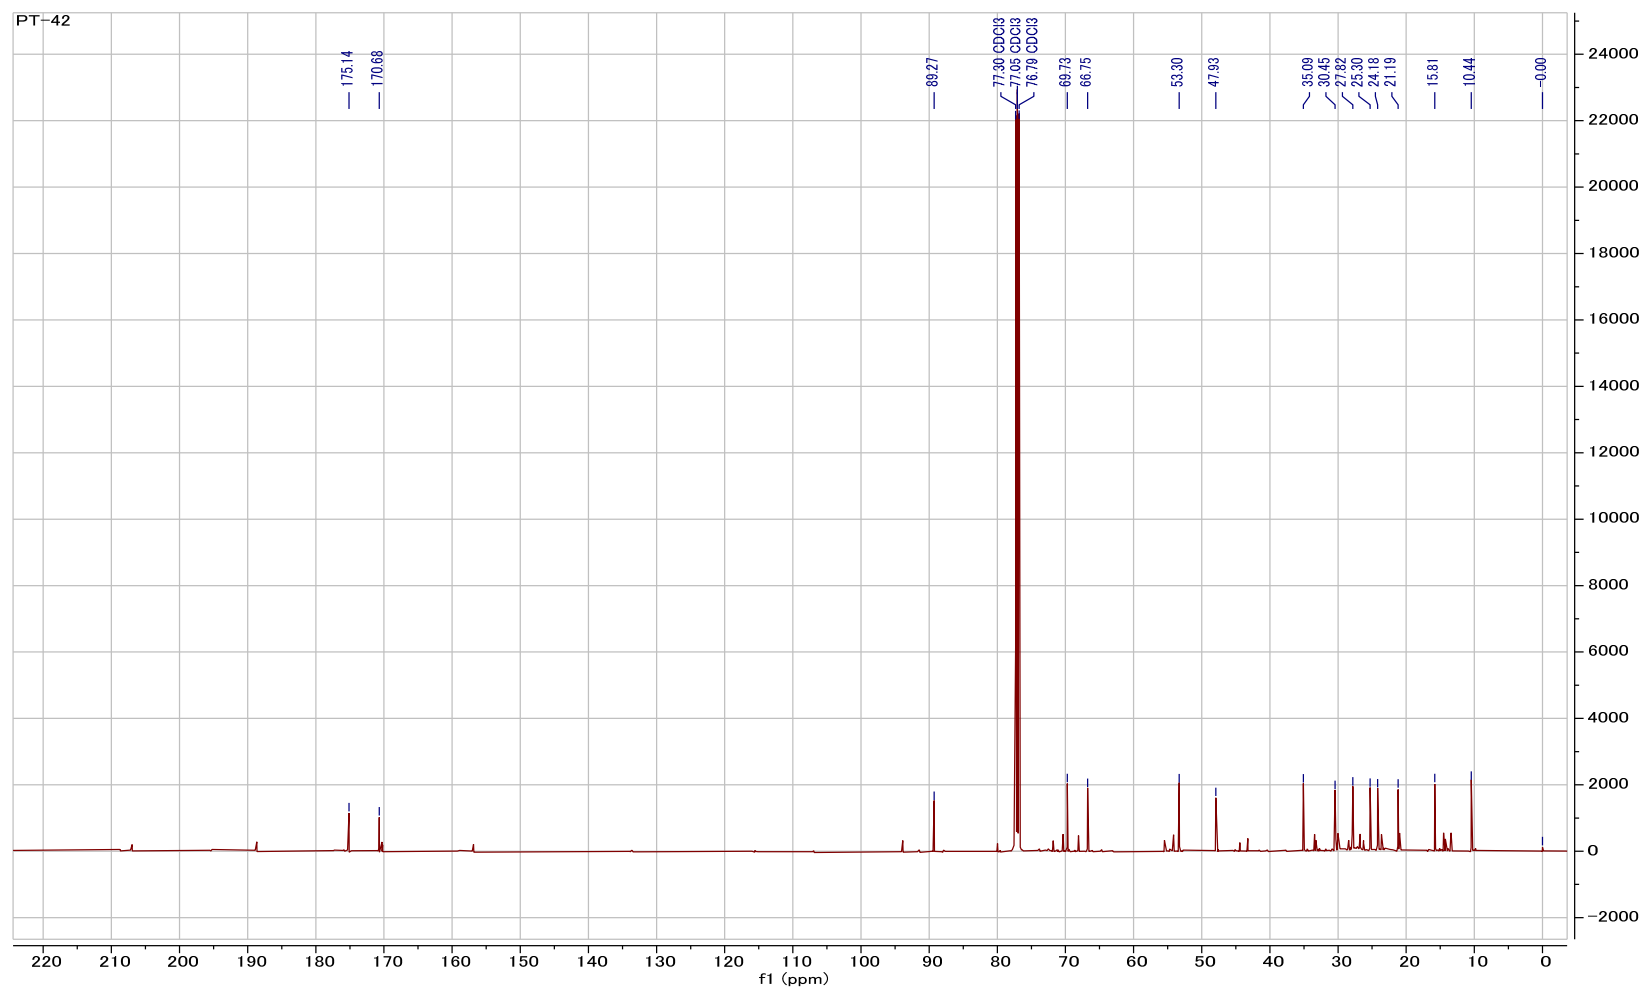

S36:  $^{13}\text{C}$ -NMR of **8**

[ Mass Spectrum ]  
Data : Umeyama-EI.17-Jul-2019.005      Date : 17-Jul-2019 15:27  
Sample : PT-45  
Note : MStation  
Inlet : Direct      Ion Mode : EI+  
Spectrum Type : Normal Ion [MF-Linear]  
RT : 0.47 min      Scan# : 15  
BP : m/z 177      Int. : 1599.98 (16776960)  
Output m/z range : 35 to 500      Cut Level : 0.00 %

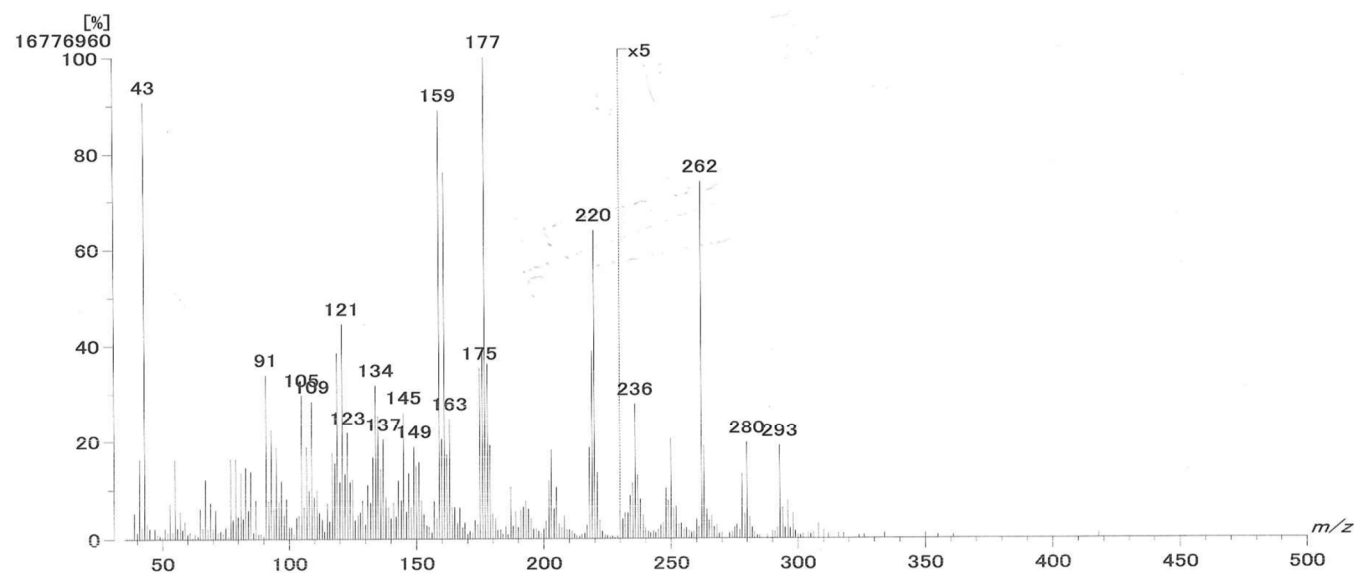

S37: LRCIMS EI-MS of 9

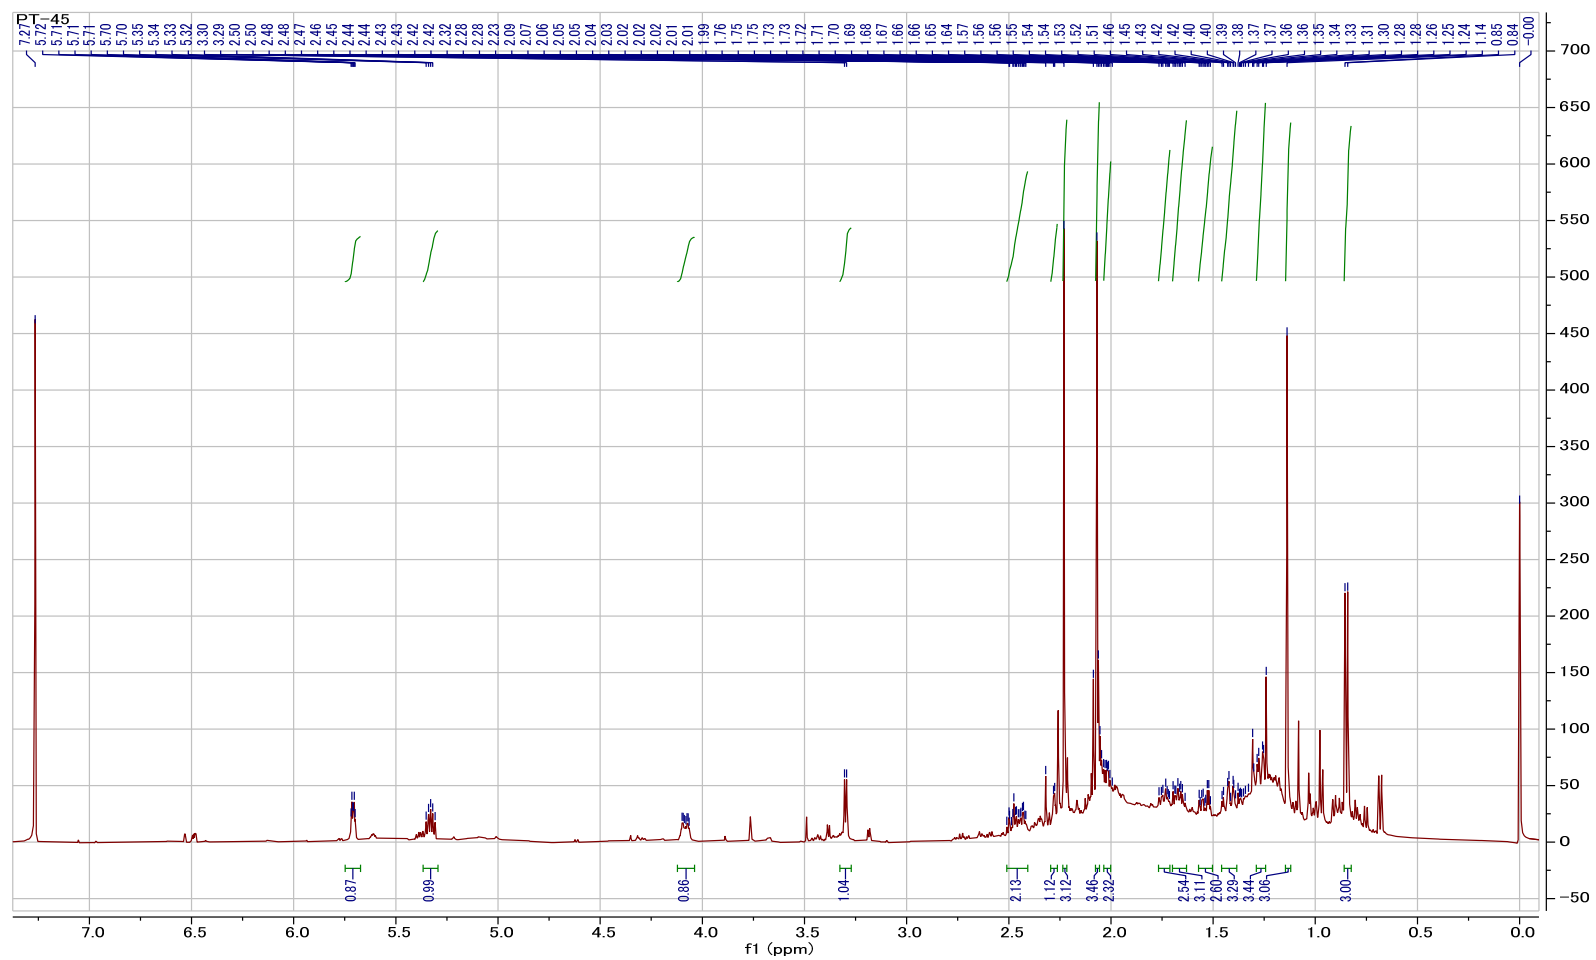

S38: <sup>1</sup>H-NMR of **9**

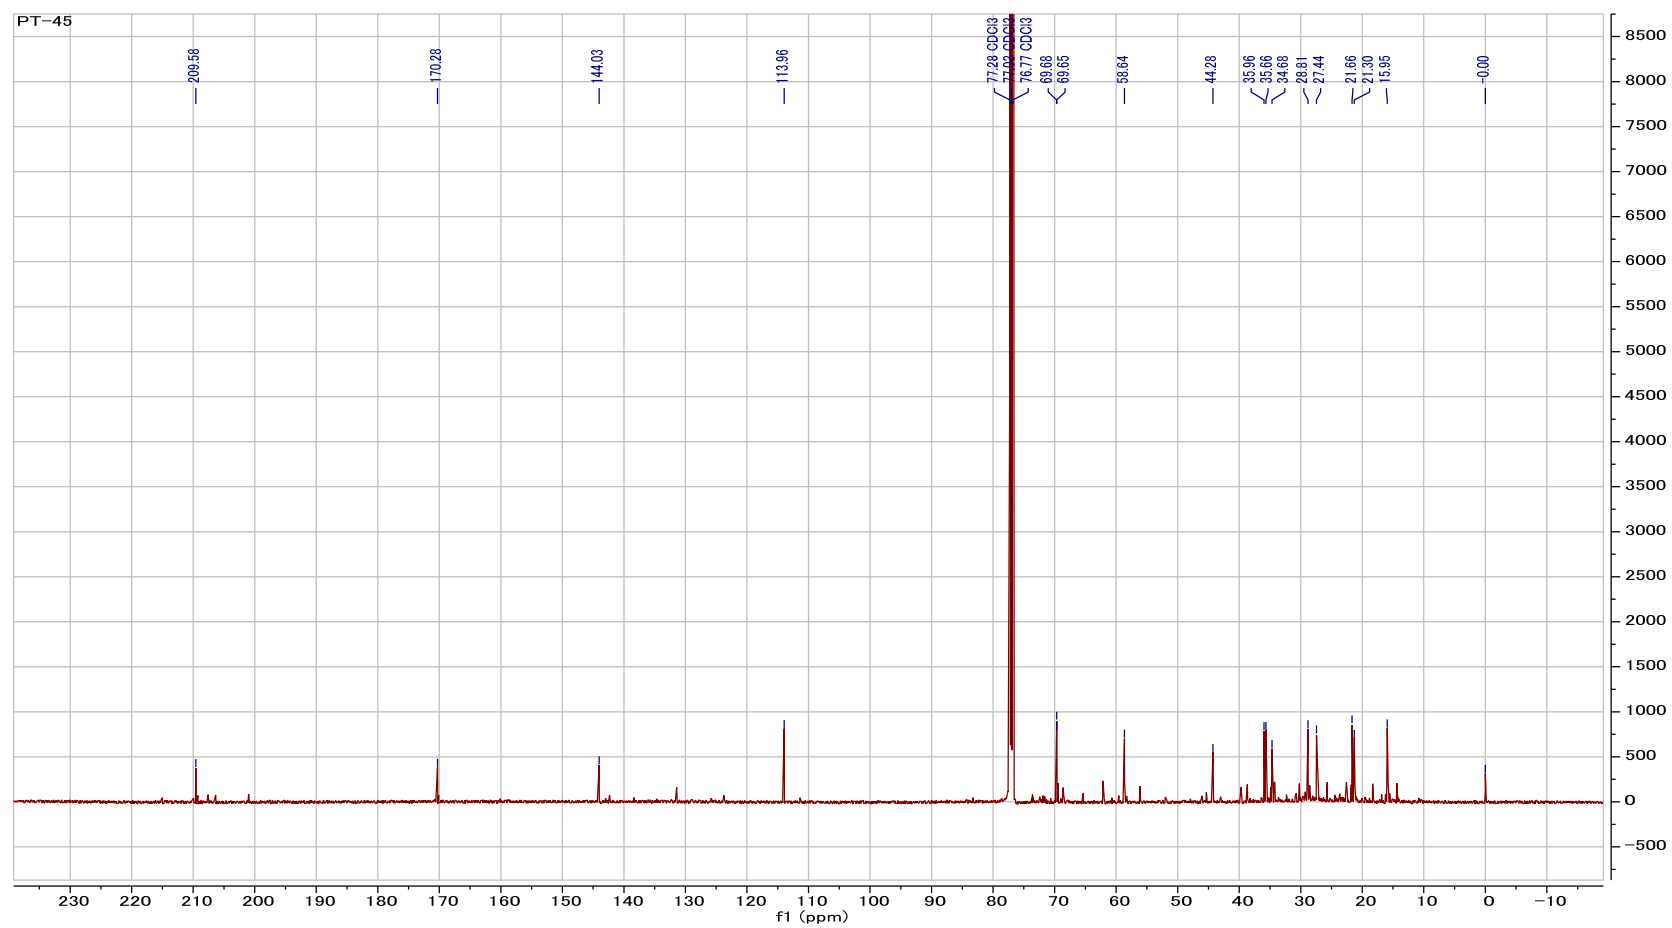

S39:  $^{13}\text{C}$ -NMR of **9**

[ Mass Spectrum ]

Data : Umeyama-El.09-Jul-2019.002      Date : 09-Jul-2019 13:45

Sample : PT-44

Note : MStation

Inlet : Direct      Ion Mode : EI+

Spectrum Type : Normal Ion [MF-Linear]

RT : 0.37 min      Scan# : 12

BP : m/z 138      Int. : 1599.98 (16776960)

Output m/z range : 35 to 500      Cut Level : 0.00 %

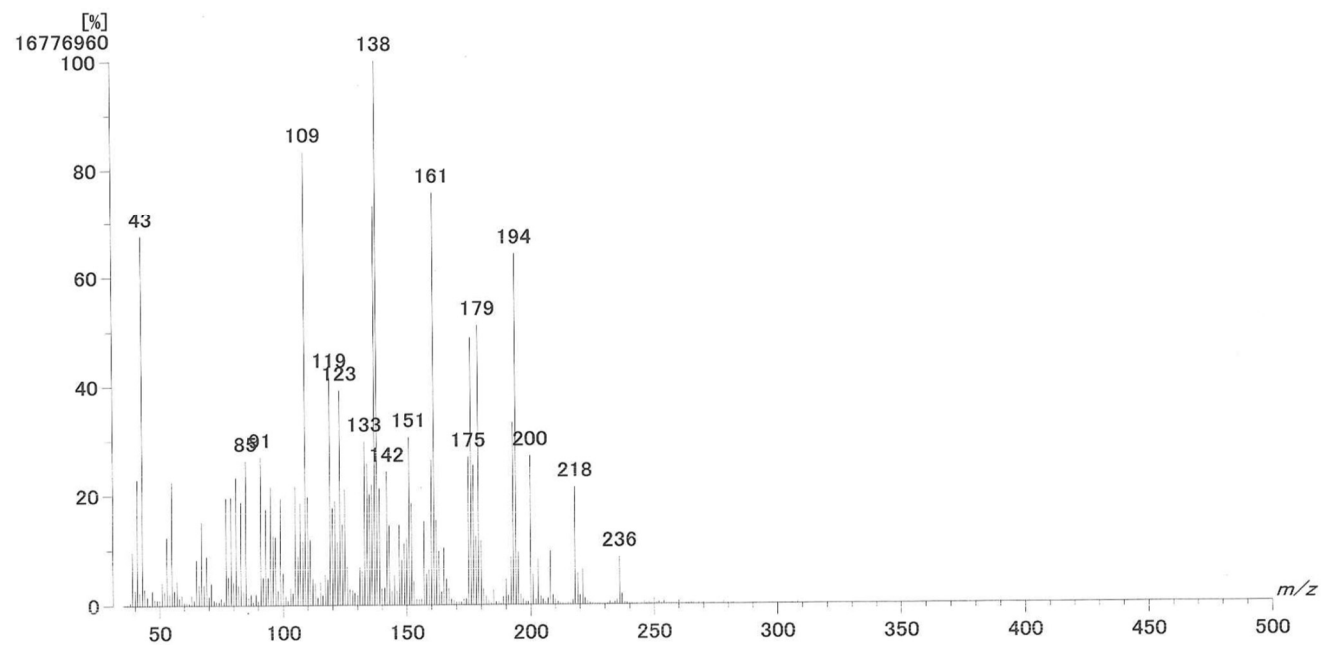

S40: LRCIMS EI-MS of **10**

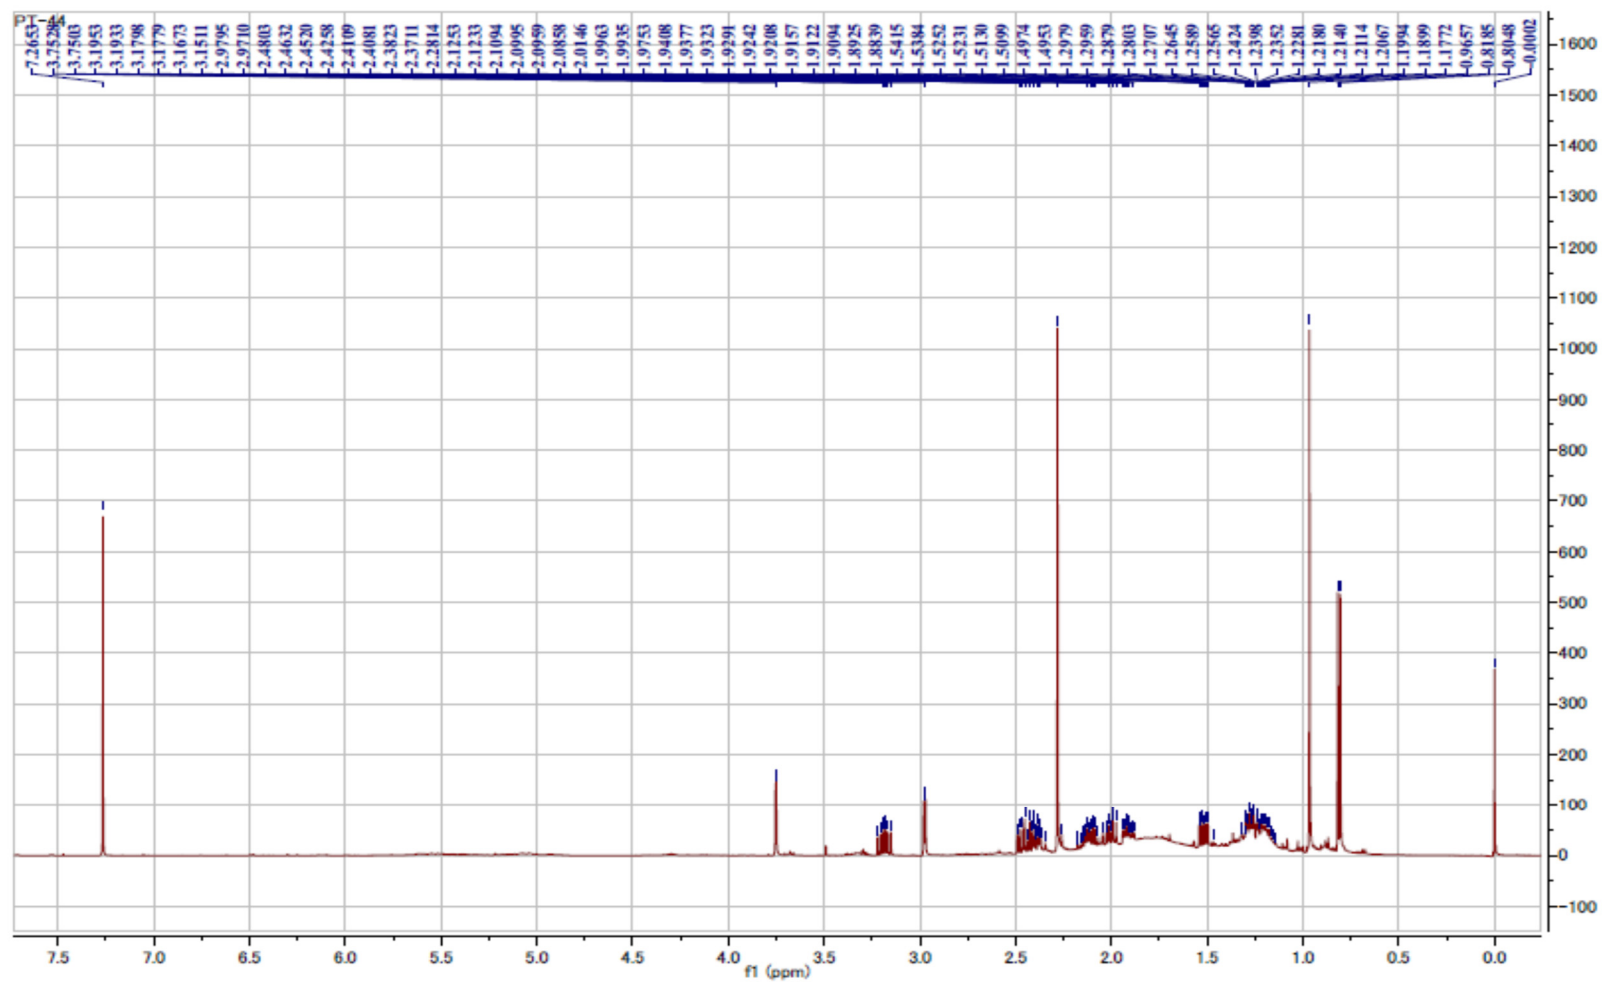

S41:  $^1\text{H}$ -NMR of **10**

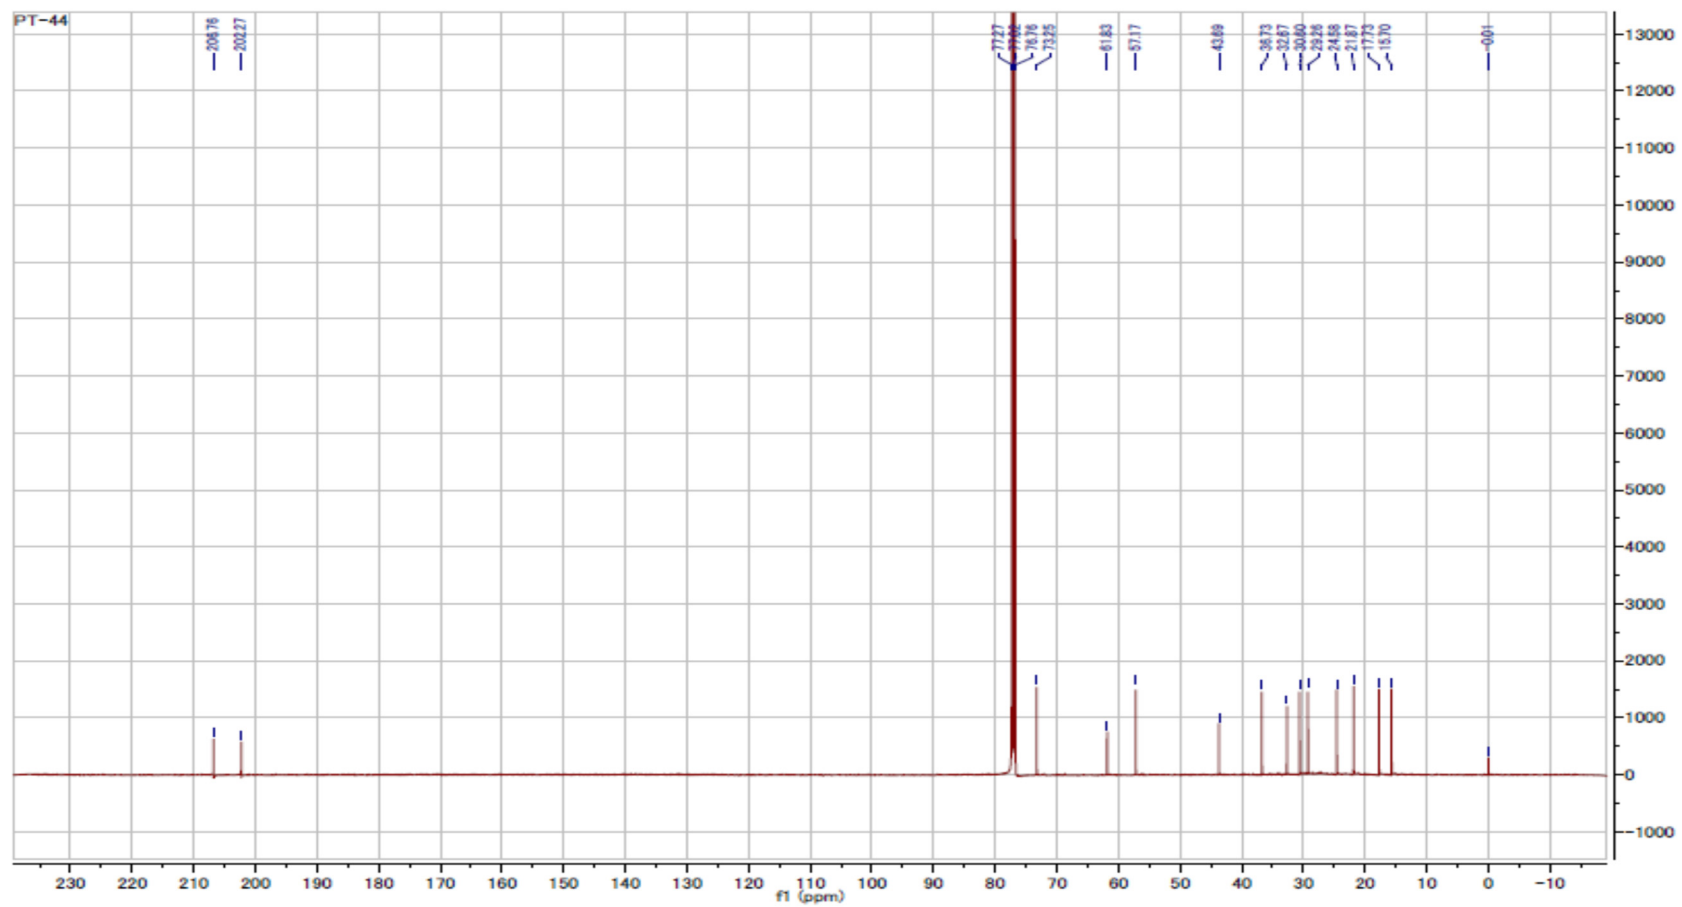

S42:  $^{13}\text{C}$ -NMR of **10**

[ Mass Spectrum ]

Data : Umeyama-El24-Jul-2019.001      Date : 24-Jul-2019 16:28

Sample : PT-34

Note : MStation

Inlet : Direct      Ion Mode : EI+

Spectrum Type : Normal Ion [MF-Linear]

RT : 0.57 min      Scan# : 18

BP : m/z 43      Int. : 1599.98 (16776960)

Output m/z range : 35 to 500      Cut Level : 0.00 %

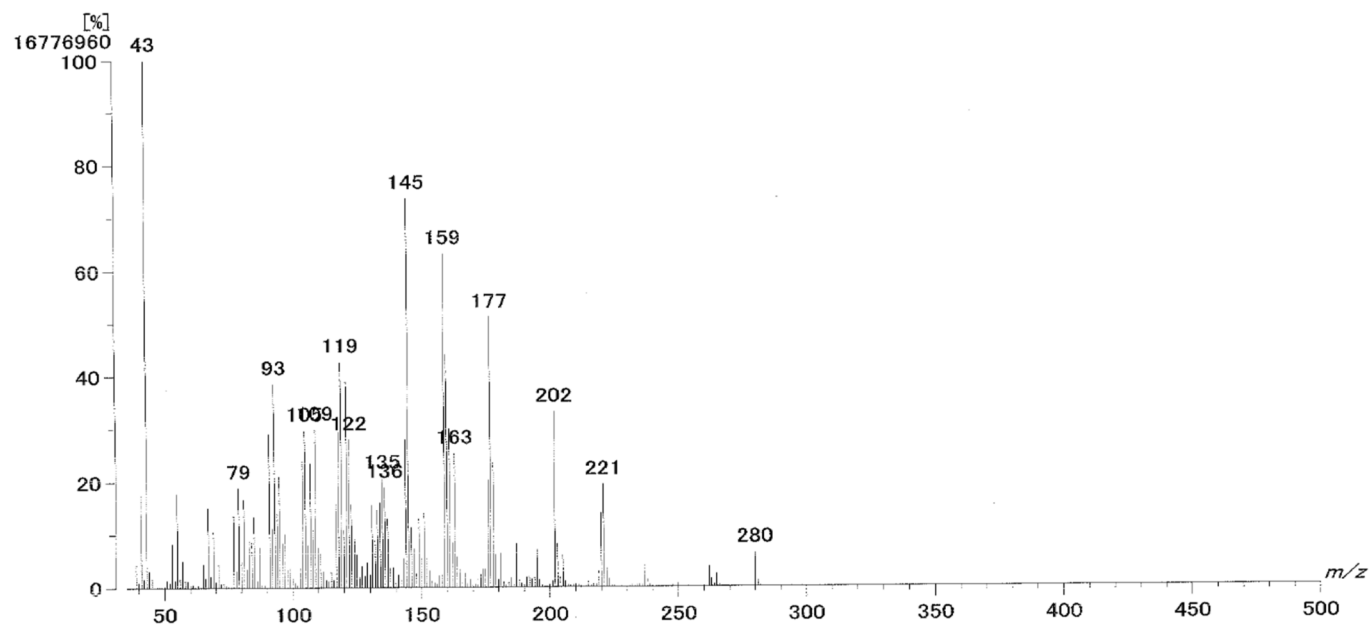

S43: LRCIMS EI-MS of 11



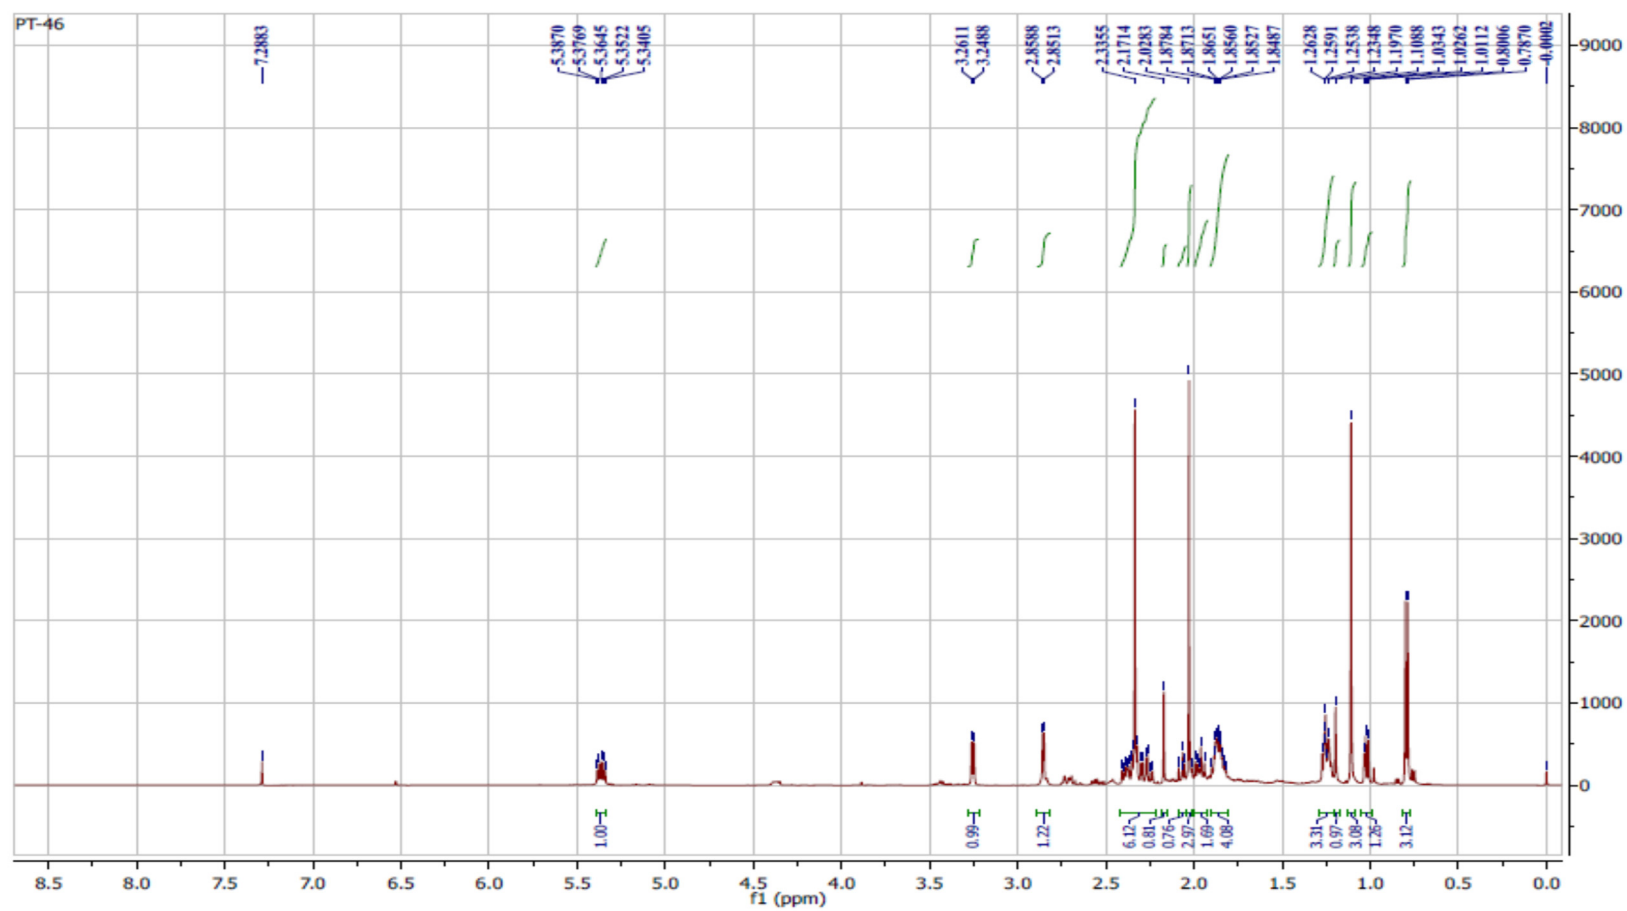

S44:  $^1\text{H}$ -NMR of **11**

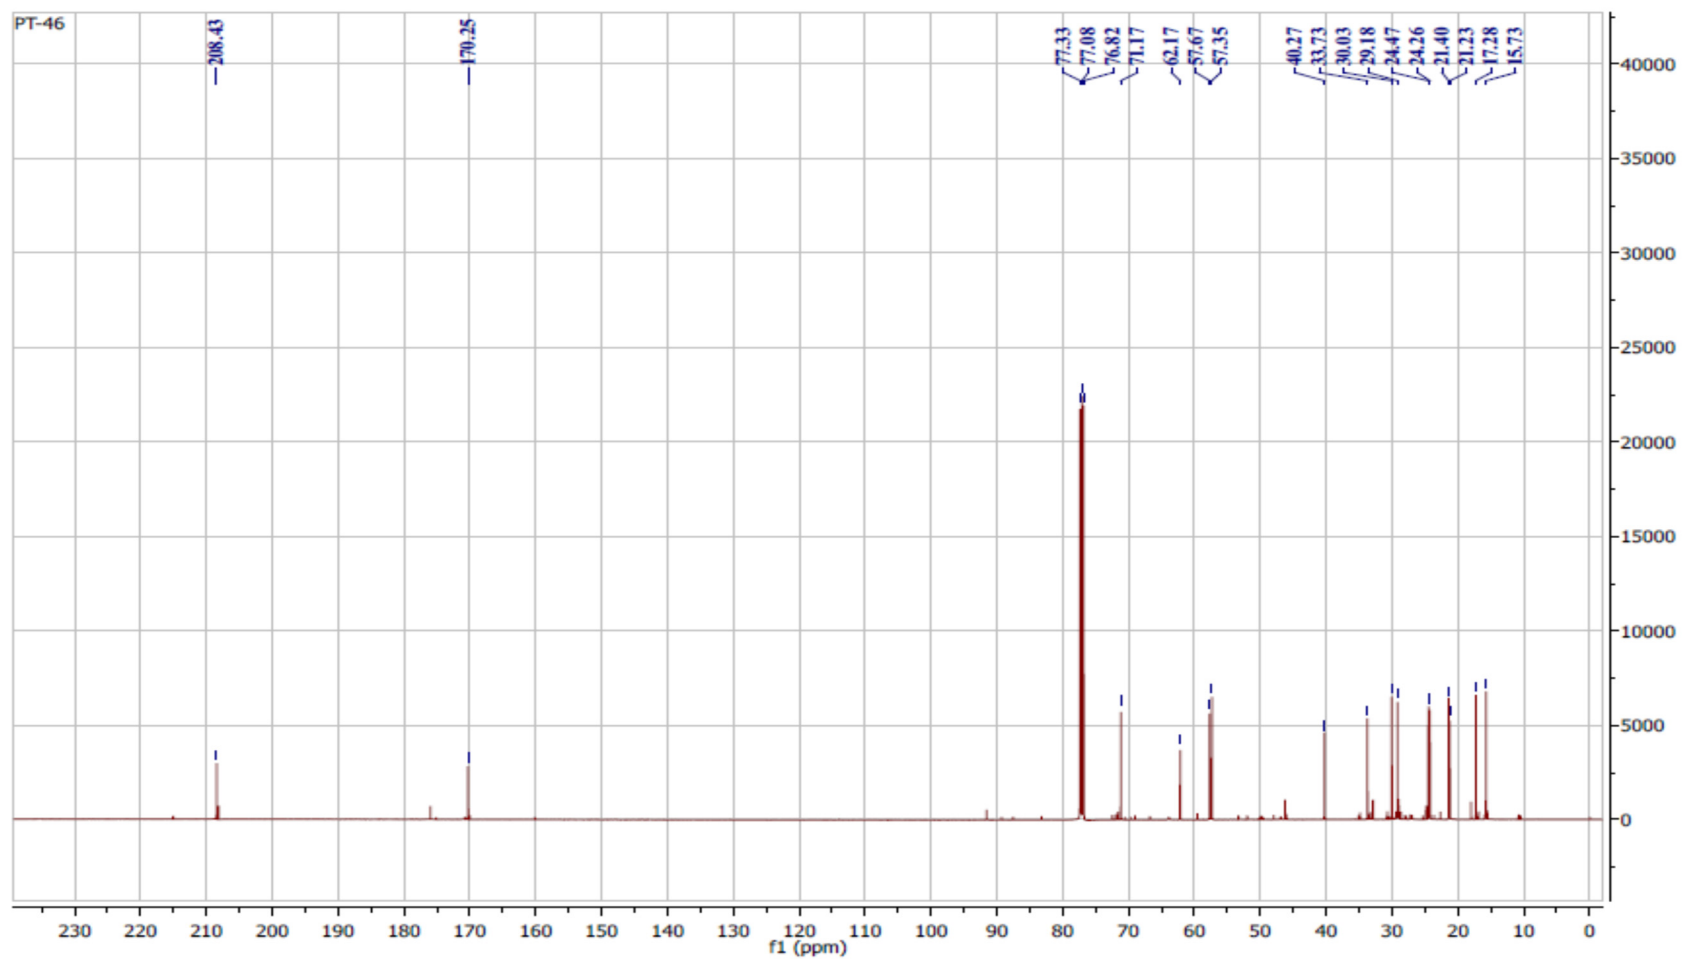

S45:  $^{13}\text{C}$ -NMR of **11**

[ Mass Spectrum ]  
Data : Umeyama-EI.17-Jul-2019.001    Date : 17-Jul-2019 10:25  
Sample : PT-49  
Note : MStation  
Inlet : Direct    Ion Mode : EI+  
Spectrum Type : Normal Ion [MF-Linear]  
RT : 0.67 min    Scan# : 21  
BP : m/z 177    Int. : 1444.04 (15141888)  
Output m/z range : 35 to 500    Cut Level : 0.00 %

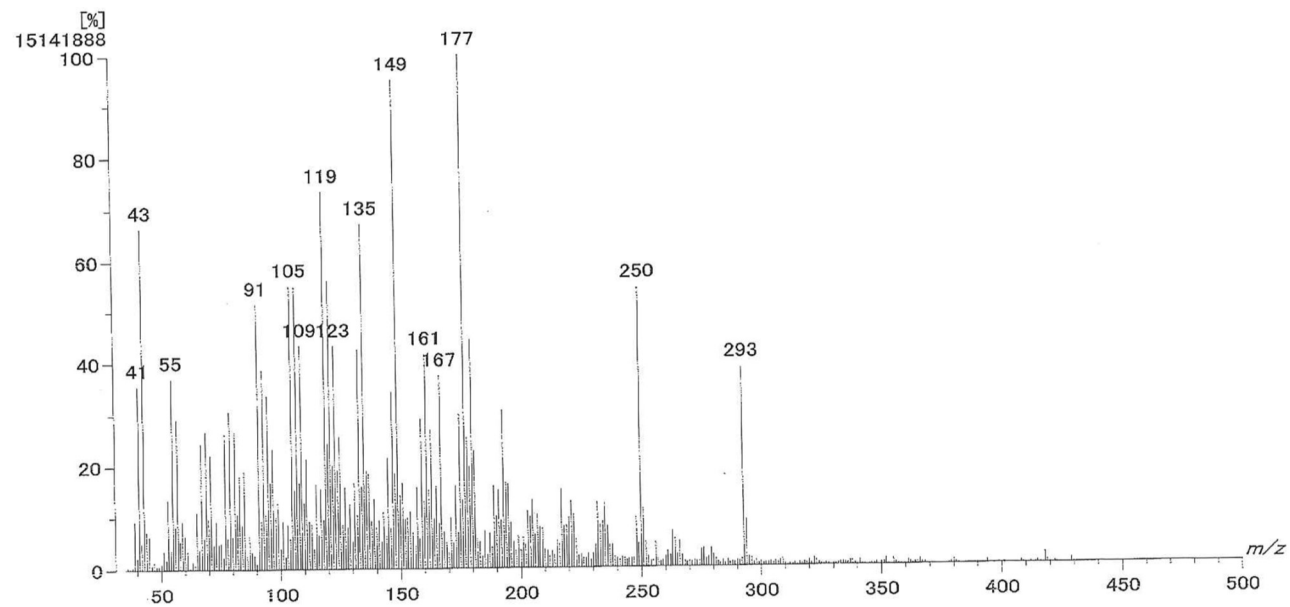

S46: LRCIMS EI-MS of 12

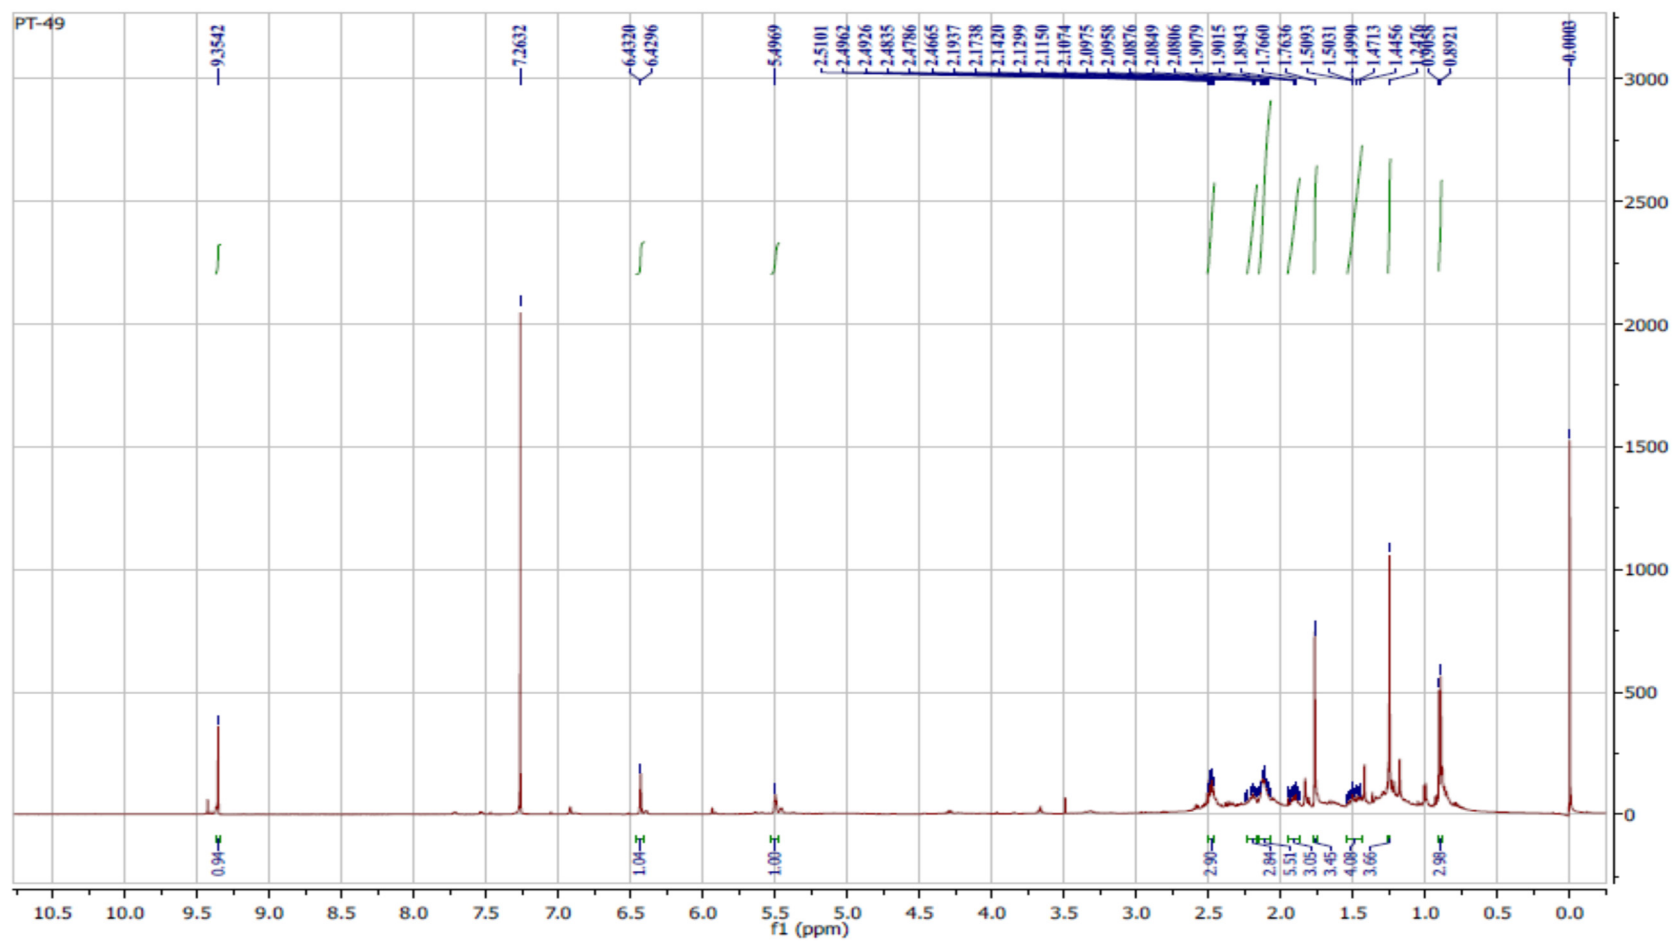

S47:  $^1\text{H}$ -NMR of **12**

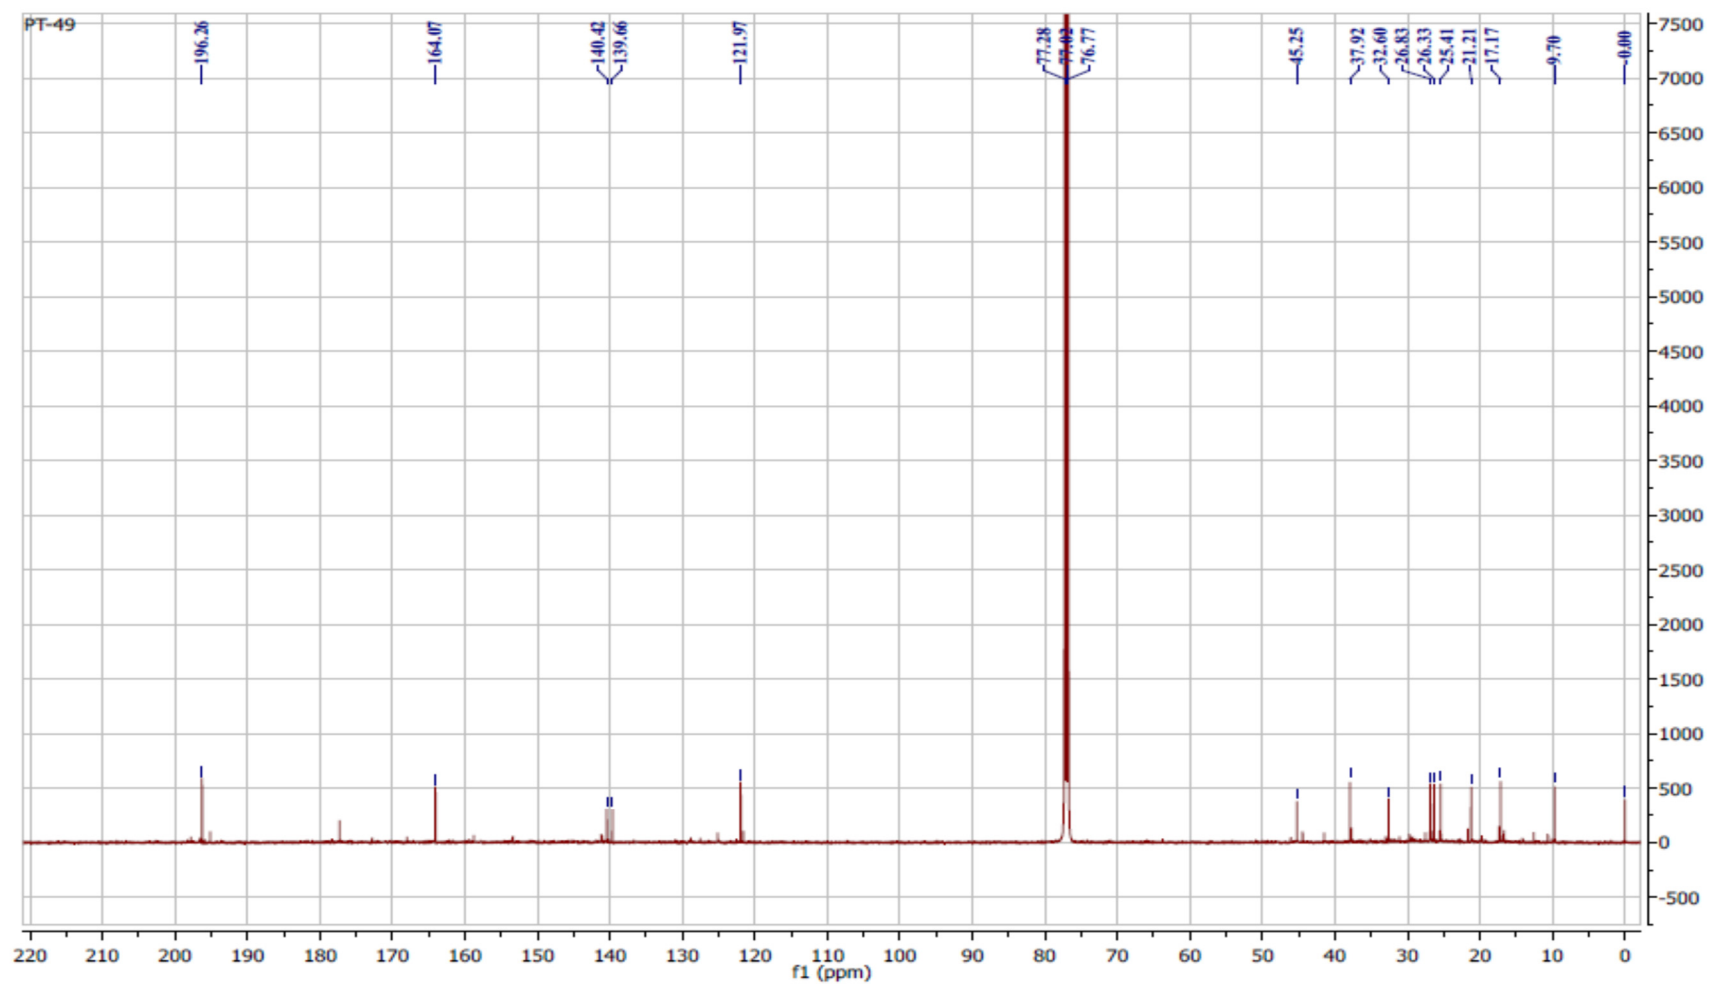

S48:  $^{13}\text{C}$ -NMR of **12**
